# Supplementary material for: The Association of Metabolomic Profiles of a Healthy Lifestyle with Heart Failure Risk in a Prospective Study
Source: MDPI journal article supplement (doi:10.3390/nu15132934), 2023-06-28
Supplement: s1 [file s1]

# Supplementary Materials

## Table of content

**Supplementary Figure S1** Pairwise Pearson correlation matrix of 161 metabolites that were included in this study.

**Supplementary Figure S2** Random Forest algorithm screening in 1:1 matched case-control population.

**Supplementary Figure S3** Principal component analysis (PCA) score plot of the 13 healthy lifestyle-related metabolites in a matched case-control study for heart failure (372 cases and 372 controls).

**Supplementary Figure S4** Principal component analysis (PCA) scree plot of the 13 healthy lifestyle-related metabolites in a matched case-control study for heart failure (372 cases and 372 controls).

**Supplementary Figure S5** Principal component analysis (PCA) variables plot of the 13 healthy lifestyle-related metabolites in a matched case-control study for heart failure (372 cases and 372 controls).

**Supplementary Table S1** Definition and healthy level of each factor in healthy lifestyles.

**Supplementary Table S2** Metabolites analyzed in the current study.

**Supplementary Table S3** Baseline characteristics of 1:1 matched case-control study.

**Supplementary Table S4** Linear regression of metabolites and healthy lifestyle in matched case-control study.

**Supplementary Table S5** Linear regression of metabolites and healthy lifestyle in cohort study.

**Supplementary Table S6** The association of healthy lifestyle-related metabolites with individual components of healthy lifestyle.

**Supplementary Table S7** Performance of risk prediction models for incident heart failure.

**Supplementary Table S8** Sensitivity Analysis.



Supplementary Figures

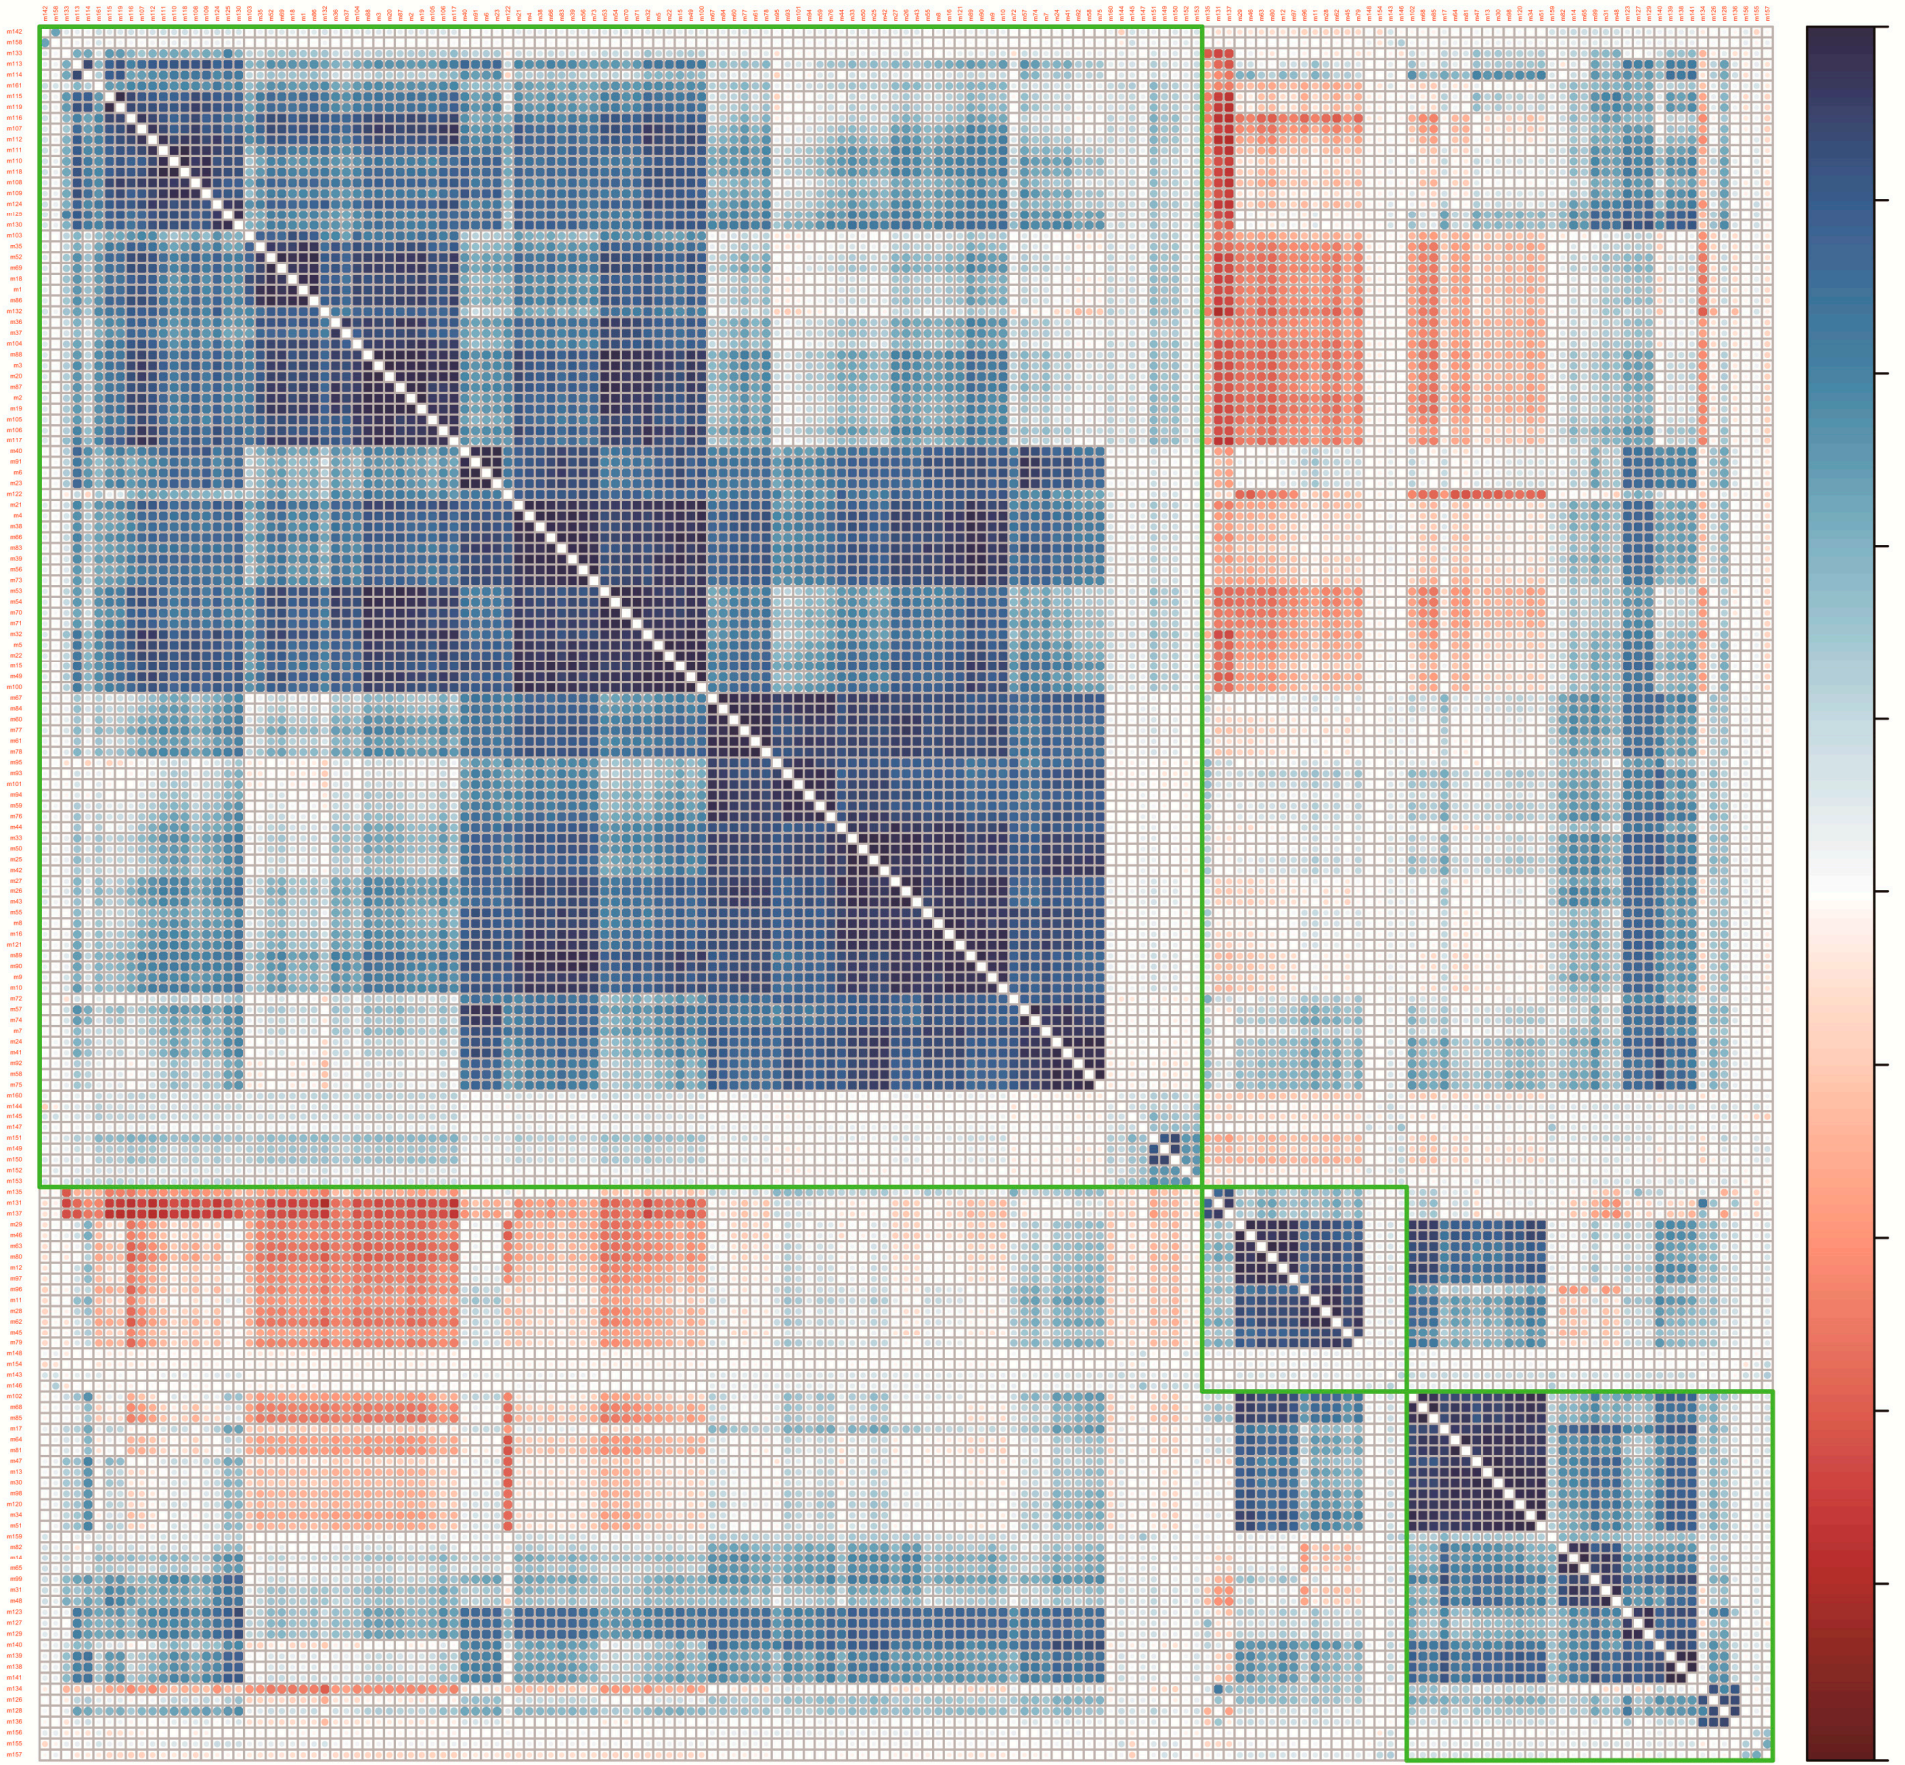

Supplementary Figure S1 Pairwise Pearson correlation matrix of 161 metabolites that were included in this study.



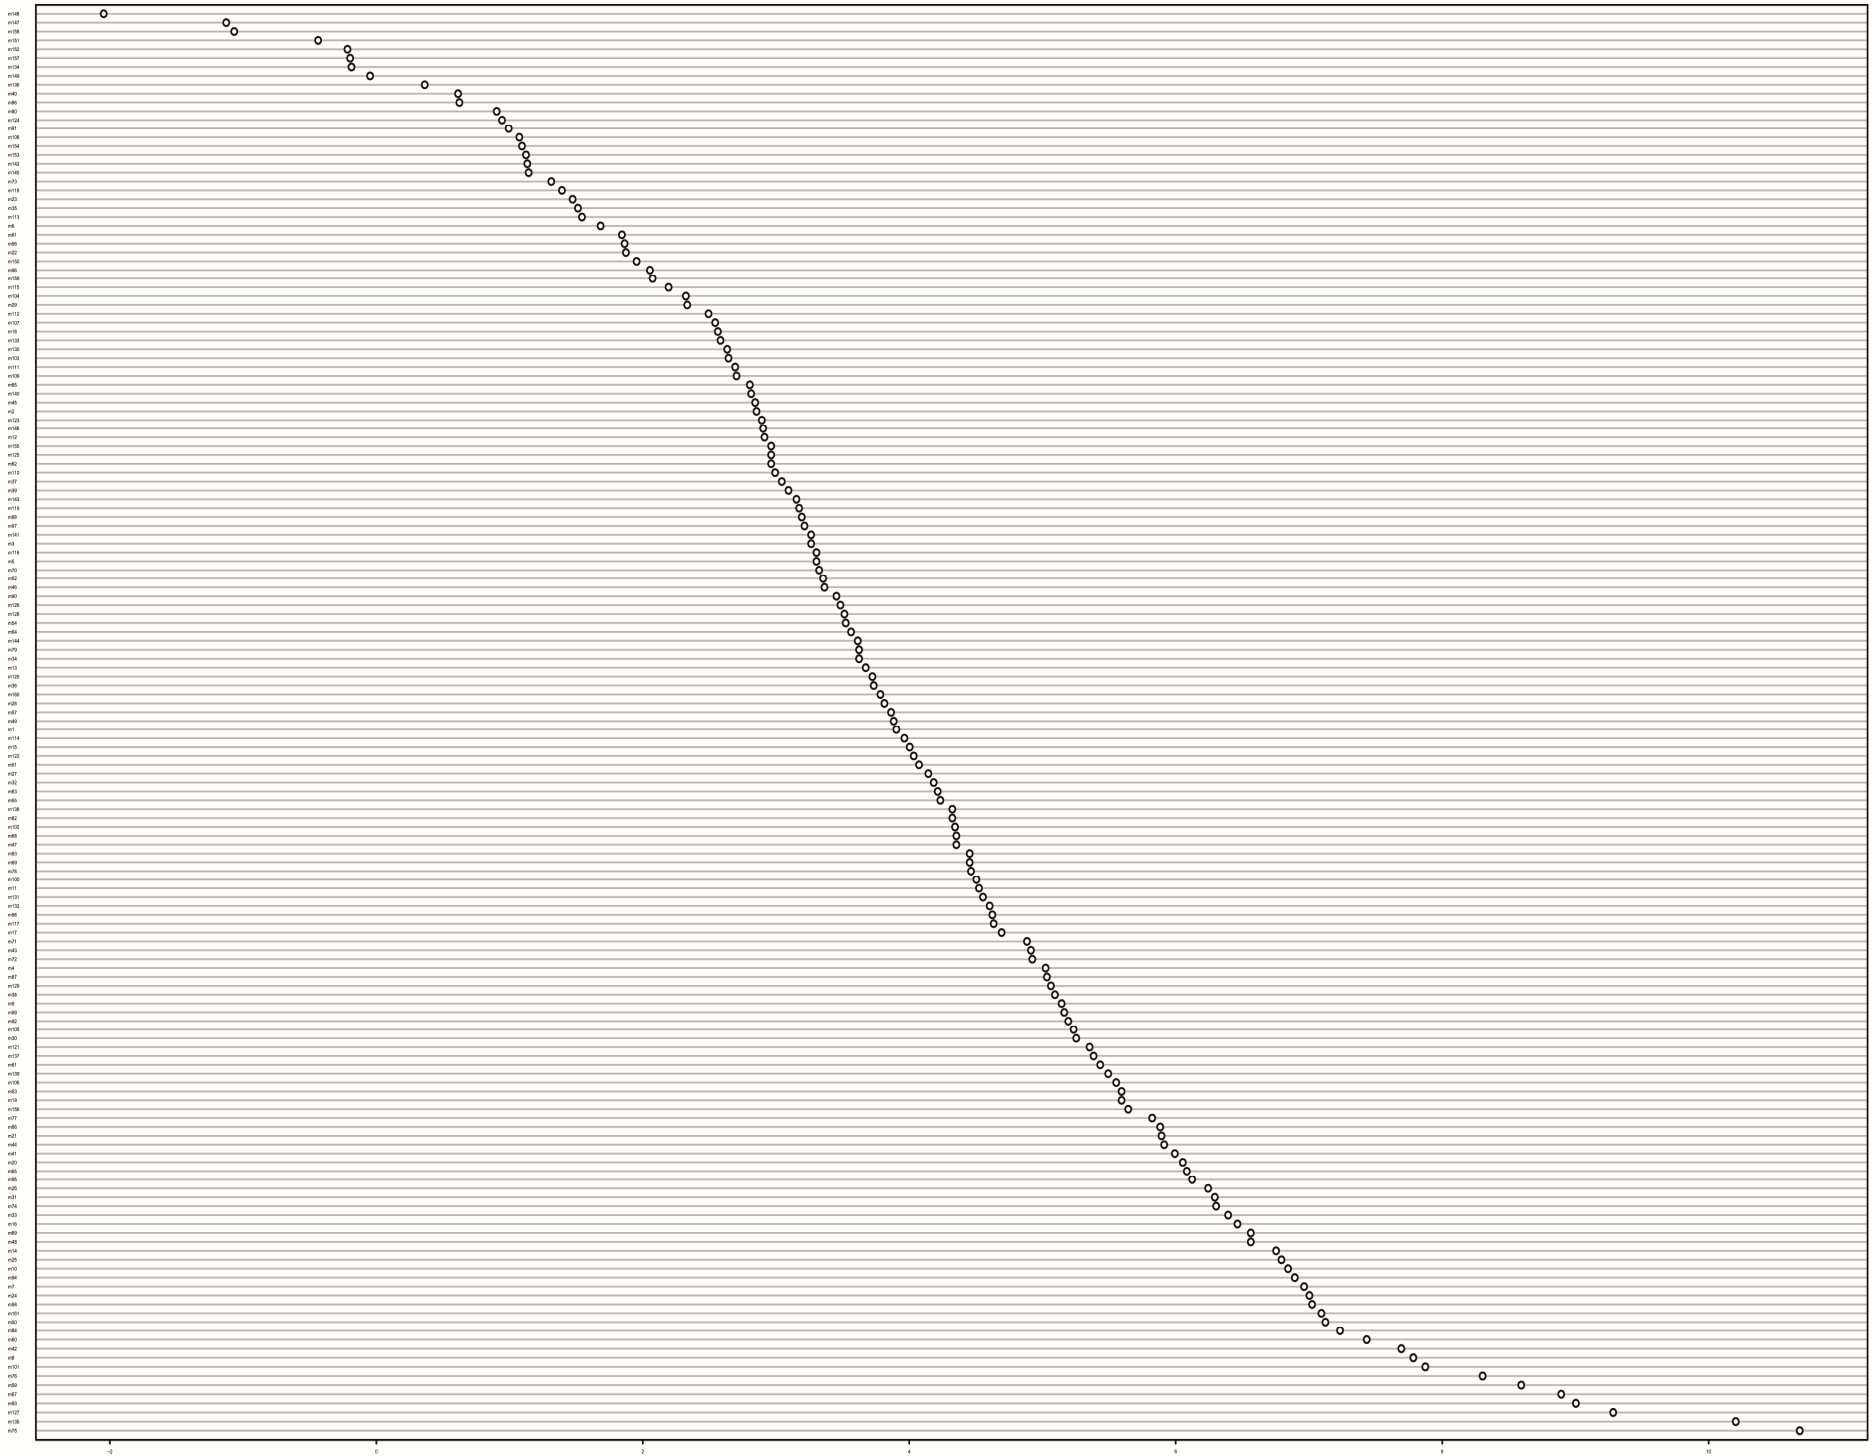

**Supplementary Figure S2 Random Forest algorithm screening in 1:1 matched case-control population.** The mean decrease accuracy  $\geq 3$  was set as the threshold in the screening. There were 108 metabolites associated with healthy lifestyle were screened by random forest algorithm.

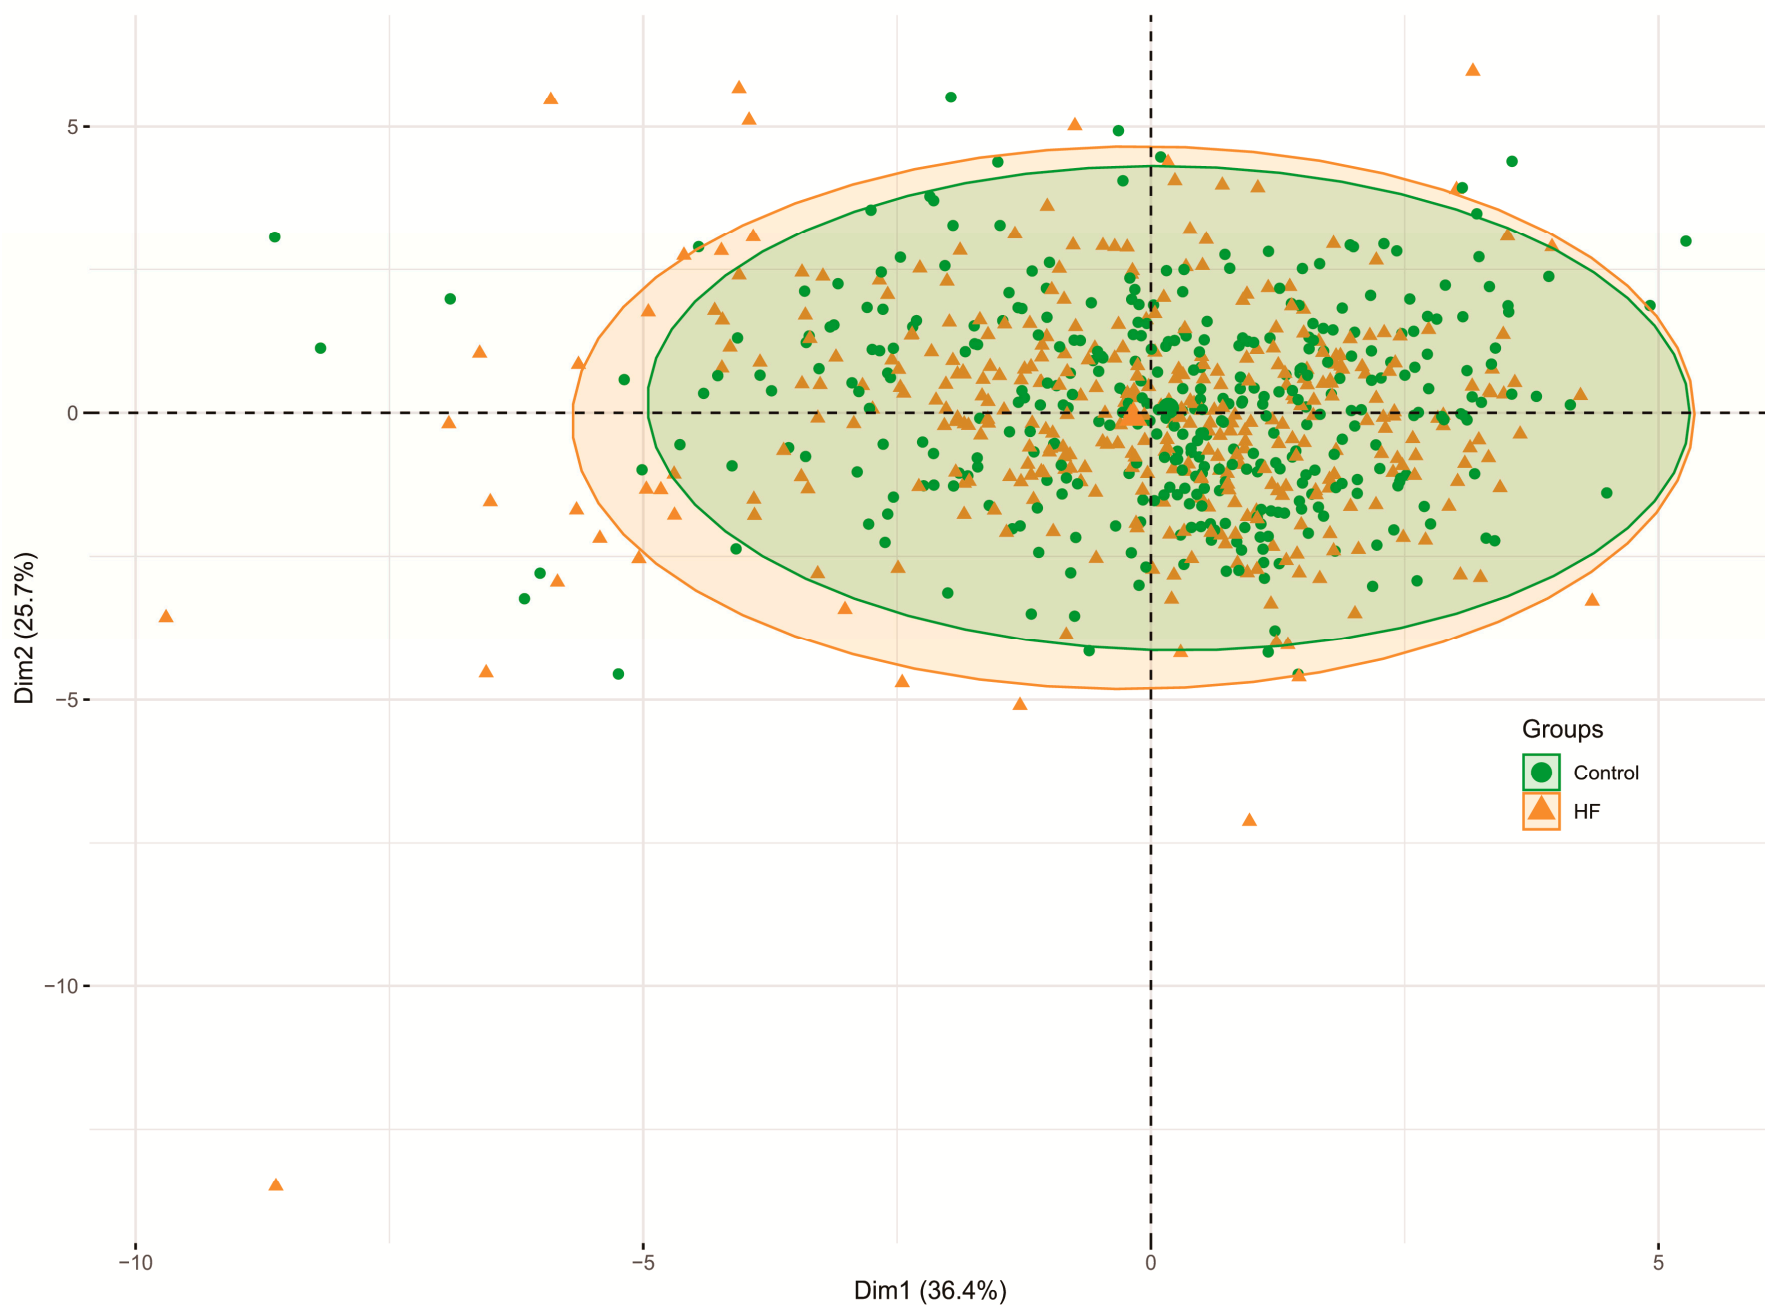

**Supplementary Figure S3 Principal component analysis (PCA) score plot of the 13 healthy lifestyle-related metabolites in a matched case-control study for heart failure (372 cases and 372 controls).**

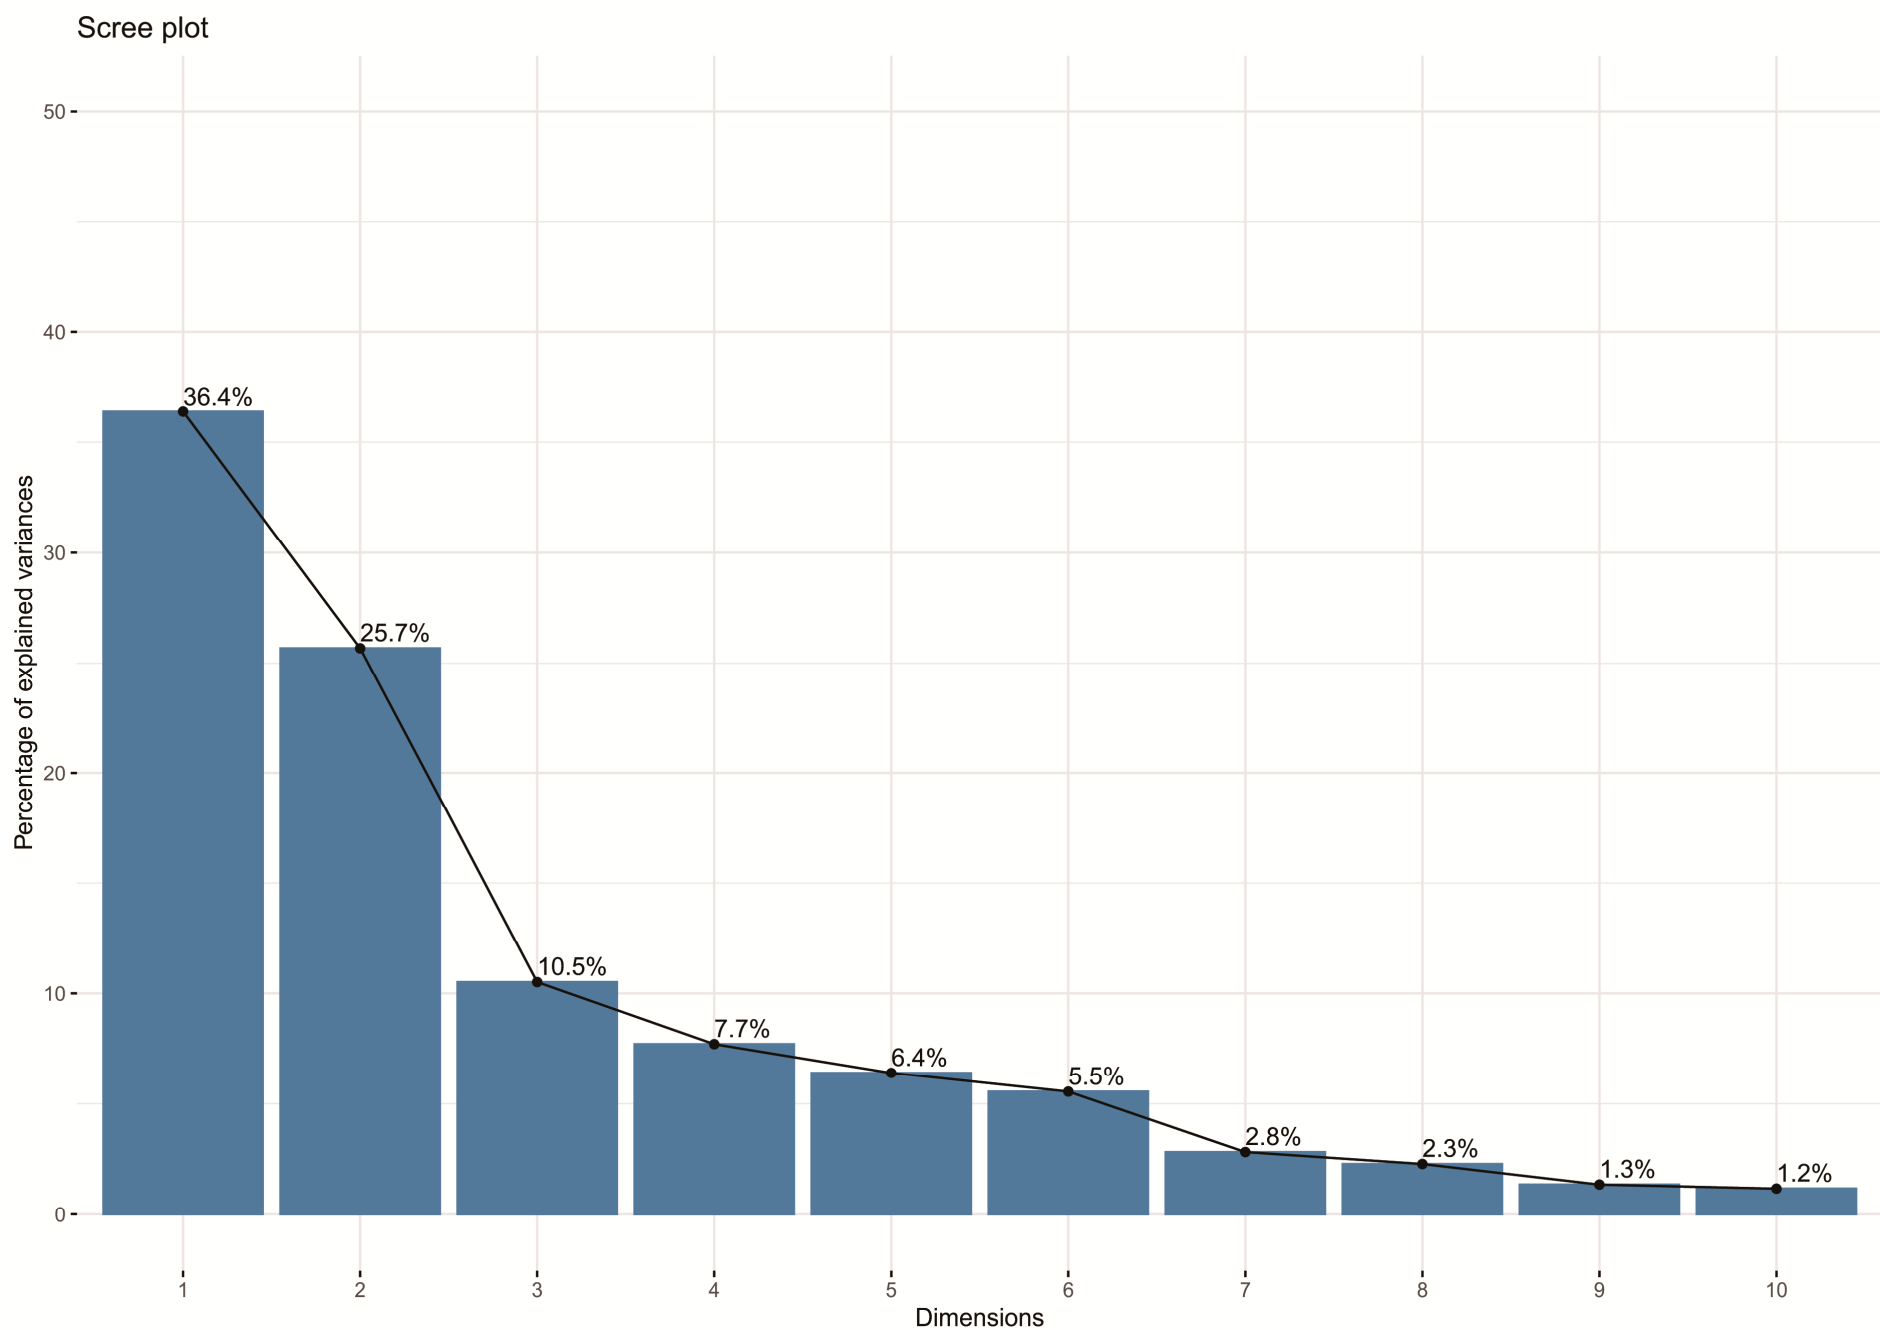

**Supplementary Figure S4 Principal component analysis (PCA) scree plot of the 13 healthy lifestyle-related metabolites in a matched case-control study for heart failure (372 cases and 372 controls).**

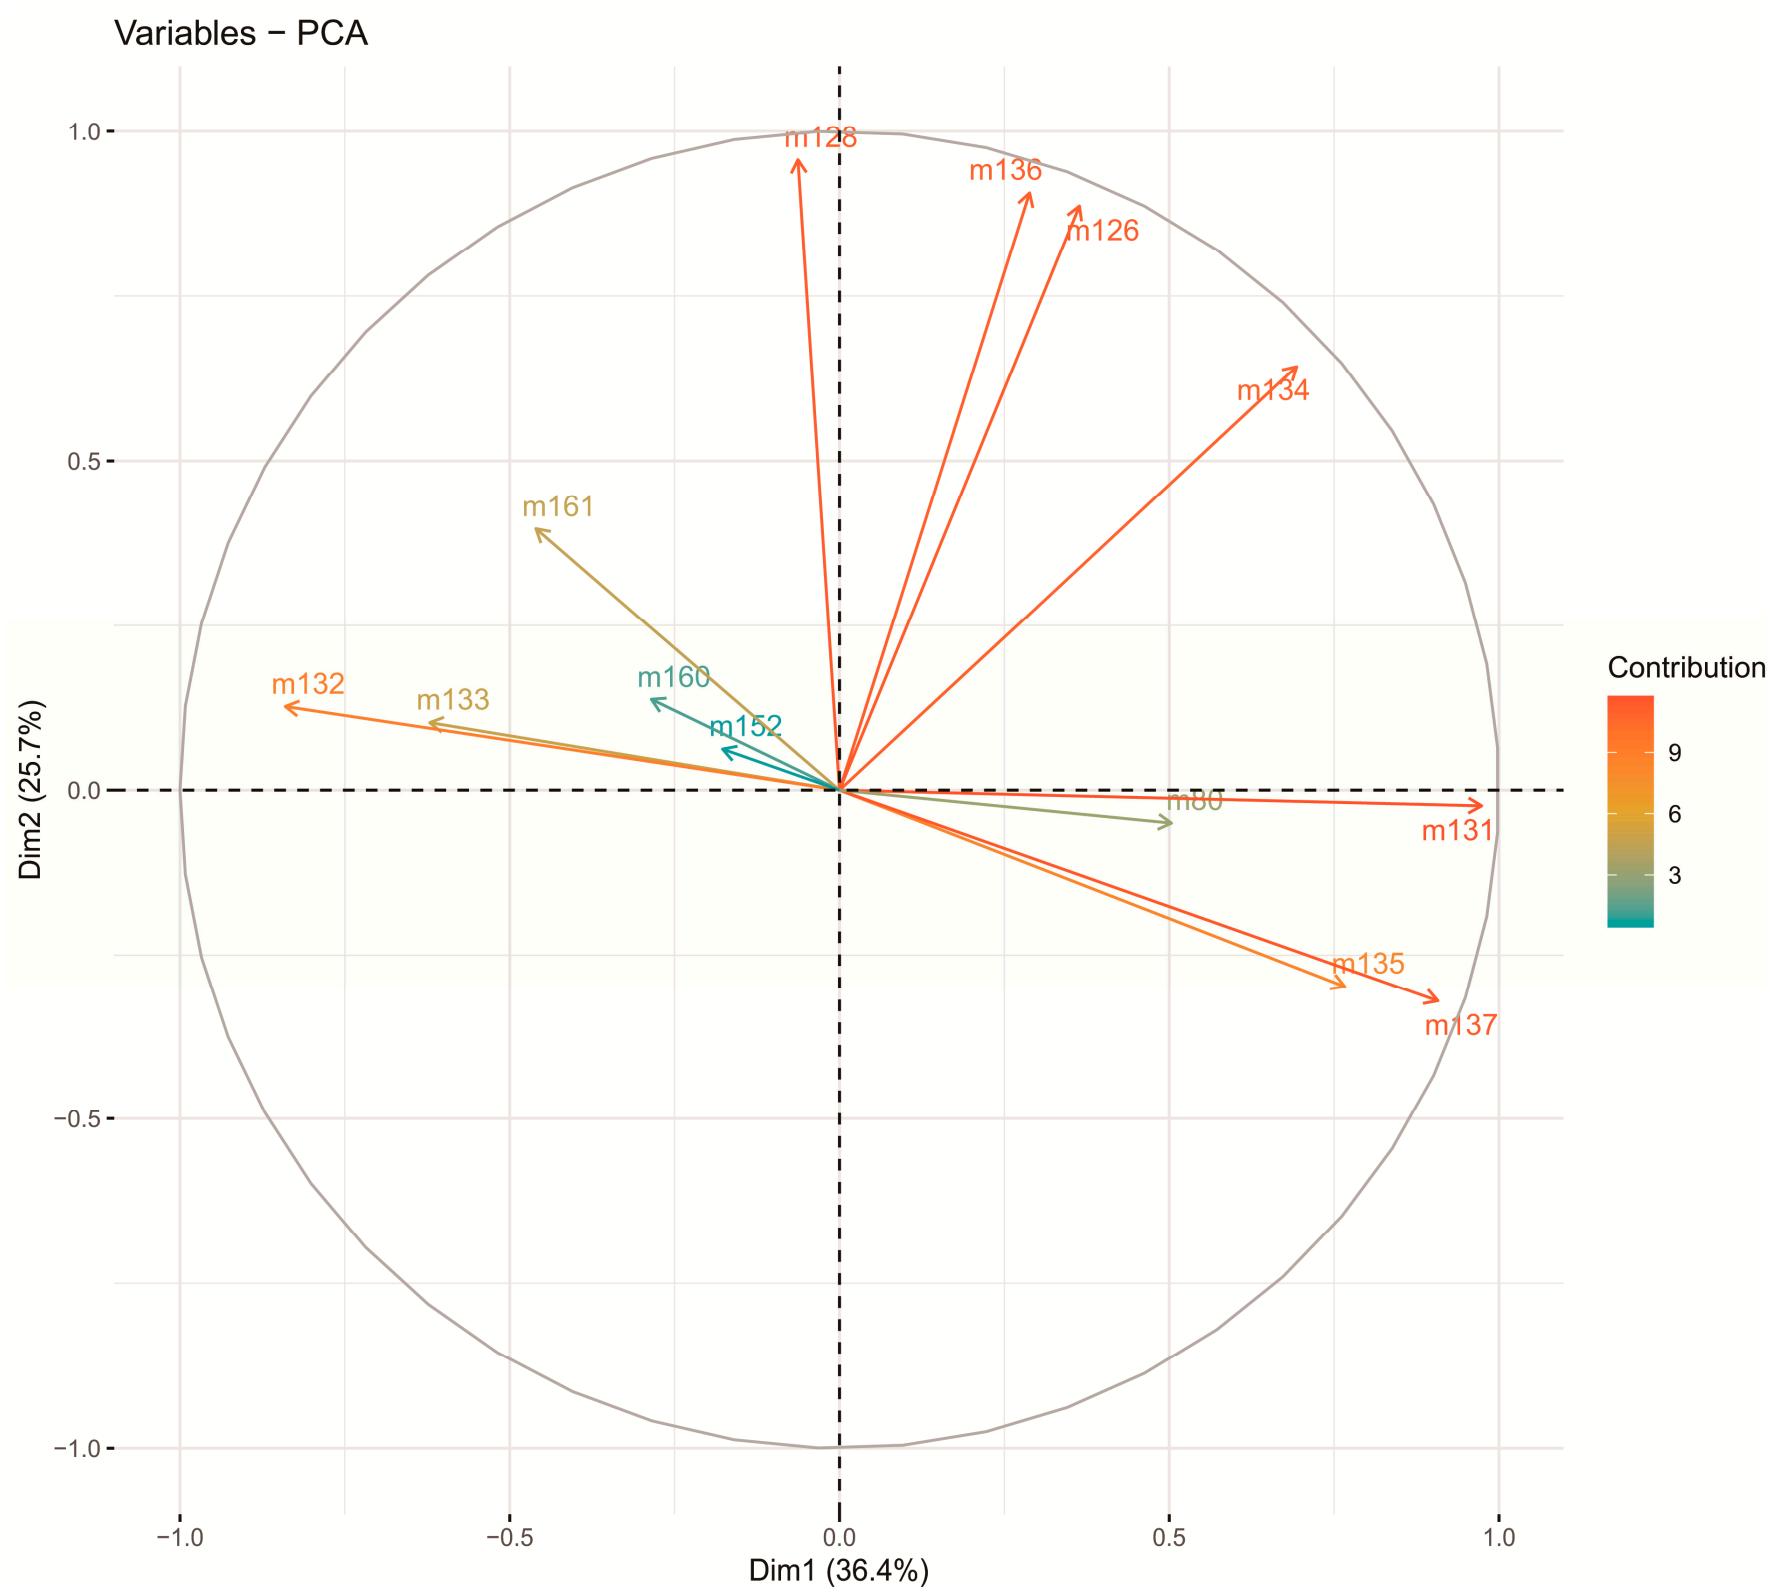

**Supplementary Figure S5 Principal component analysis (PCA) variables plot of the 13 healthy lifestyle-related metabolites in a matched case-control study for heart failure (372 cases and 372 controls).**

## Supplementary Tables

Supplementary Table S1 Definition and healthy level of each factor in healthy lifestyle

| Healthy Lifestyle Factor | Healthy Level<br>(Assigned 1 Point)                                                                                                                                                                                                                                                                                                                                                                                                                                                                                                                                                                                                                                                                                                                                                                                                                                                                                                                                                                                                                                                                                                                                                                                                                                                                                                                                                                                                   | Self-Reported UK Biobank Field Code                                                                                          |
|--------------------------|---------------------------------------------------------------------------------------------------------------------------------------------------------------------------------------------------------------------------------------------------------------------------------------------------------------------------------------------------------------------------------------------------------------------------------------------------------------------------------------------------------------------------------------------------------------------------------------------------------------------------------------------------------------------------------------------------------------------------------------------------------------------------------------------------------------------------------------------------------------------------------------------------------------------------------------------------------------------------------------------------------------------------------------------------------------------------------------------------------------------------------------------------------------------------------------------------------------------------------------------------------------------------------------------------------------------------------------------------------------------------------------------------------------------------------------|------------------------------------------------------------------------------------------------------------------------------|
| Smoking status           | Smoking status was defined as current, previous, never smoker; Never smoking was considered as a healthy level                                                                                                                                                                                                                                                                                                                                                                                                                                                                                                                                                                                                                                                                                                                                                                                                                                                                                                                                                                                                                                                                                                                                                                                                                                                                                                                        | 20116                                                                                                                        |
| alcohol consumption      | <p>Participants were asked about the frequency of drinking alcohol, i.e., (almost) daily, three or four times a week, once or twice a week, one to three times a month, special occasions only, never, and prefer not to answer. Those who reported to drink alcohol would be asked about how much red wine (glasses), white wine (glasses), beer or cider (pints), spirits or liqueurs (standard measures), fortified wine (glasses), and other alcoholic drinks (glasses) they consumed in an average month or week. We used the information to calculate the average units of alcohol each participant drank daily.</p> <p>A healthy level was defined as daily consumption of one drink or fewer for women and two drinks or fewer for men, according to the dietary guidelines in the US and UK (one drink contains 14 g of ethanol in the US and 8 g in the UK)</p>                                                                                                                                                                                                                                                                                                                                                                                                                                                                                                                                                             | 20117                                                                                                                        |
| physical activity        | <p><math>\geq 150</math> minutes moderate activity per week OR <math>\geq 75</math> minutes vigorous activity per week OR equivalent combination OR moderate physical activity at least 5 days a week and vigorous activity once a week</p>                                                                                                                                                                                                                                                                                                                                                                                                                                                                                                                                                                                                                                                                                                                                                                                                                                                                                                                                                                                                                                                                                                                                                                                           | 884, 894, 904, 914                                                                                                           |
| Healthy diet             | <p>At least 5 of the following recommendations:</p> <ol style="list-style-type: none"> <li>1. Fruits: <math>\geq 3</math> servings/day</li> <li>2. Vegetables: <math>\geq 3</math> servings/day</li> <li>3. Whole grains: <math>\geq 3</math> servings/day</li> <li>4. (Shell)Fish: <math>\geq 2</math> times/week</li> <li>5. Dairy: <math>\geq 2</math> servings/day</li> <li>6. Vegetables oils: <math>\geq 2</math> servings/day</li> <li>7. Refined grains: <math>\leq 2</math> servings/day</li> <li>8. Processed meats: <math>\leq 1</math> servings/week</li> <li>9. Unprocessed meats: <math>\leq 2</math> servings/week</li> <li>10. Sugar-sweetened beverages: Don't drink</li> </ol> <p>(Amount per serving: fresh fruit- 1 piece; dried fruit- 5 pieces; vegetables- 3 heaped tablespoons; whole meal/ wholegrain bread- 1 slice/day); bran/oat/muesli cereal 1 bowls/week; oily fish/non-oily fish once/week; cheese 1 piece/day; milk type 1 glass/day if consumption of any type of milk; Flora Pro-Active/ Benecol, soft margarine -, olive oil based -, polyunsaturated/sunflower oil based -, other low/reduced fat spread 1 serving/day if in combination with eating at least 2 slices of bread; white, brown, other bread slices 1 slice/day; biscuit, other cereals 1 bowl/day; processed meat 1 piece/day; 0 pieces/day if indicated having never eaten meat; poultry/beef/lamb or mutton/pork once/week.</p> | 1309, 1319, 1289, 1299, 1438, 1448, 1458, 1468, 1329, 1339, 1408, 1418, 1428, 2654, 1349, 3680, 1359, 1369, 1379, 1389, 6144 |

**Supplementary Table S2 Metabolites analyzed in the current study**

| <b>ID</b> | <b>Metabolites</b>                                               | <b>Superclass</b>                   |
|-----------|------------------------------------------------------------------|-------------------------------------|
| m1        | Concentration of Chylomicrons and Extremely Large VLDL Particles | Lipoprotein particle concentrations |
| m2        | Concentration of Very Large VLDL Particles                       | Lipoprotein particle concentrations |
| m3        | Concentration of Large VLDL Particles                            | Lipoprotein particle concentrations |
| m4        | Concentration of Medium VLDL Particles                           | Lipoprotein particle concentrations |
| m5        | Concentration of Small VLDL Particles                            | Lipoprotein particle concentrations |
| m6        | Concentration of Very Small VLDL Particles                       | Lipoprotein particle concentrations |
| m7        | Concentration of IDL Particles                                   | Lipoprotein particle concentrations |
| m8        | Concentration of Large LDL Particles                             | Lipoprotein particle concentrations |
| m9        | Concentration of Medium LDL Particles                            | Lipoprotein particle concentrations |
| m10       | Concentration of Small LDL Particles                             | Lipoprotein particle concentrations |
| m11       | Concentration of Very Large HDL Particles                        | Lipoprotein particle concentrations |
| m12       | Concentration of Large HDL Particles                             | Lipoprotein particle concentrations |
| m13       | Concentration of Medium HDL Particles                            | Lipoprotein particle concentrations |
| m14       | Concentration of Small HDL Particles                             | Lipoprotein particle concentrations |
| m15       | Concentration of VLDL Particles                                  | Lipoprotein particle concentrations |
| m16       | Concentration of LDL Particles                                   | Lipoprotein particle concentrations |
| m17       | Concentration of HDL Particles                                   | Lipoprotein particle concentrations |
| m18       | Total Lipids in Chylomicrons and Extremely Large VLDL            | Total lipid concentrations          |
| m19       | Total Lipids in Very Large VLDL                                  | Total lipid concentrations          |
| m20       | Total Lipids in Large VLDL                                       | Total lipid concentrations          |
| m21       | Total Lipids in Medium VLDL                                      | Total lipid concentrations          |
| m22       | Total Lipids in Small VLDL                                       | Total lipid concentrations          |
| m23       | Total Lipids in Very Small VLDL                                  | Total lipid concentrations          |
| m24       | Total Lipids in IDL                                              | Total lipid concentrations          |
| m25       | Total Lipids in Large LDL                                        | Total lipid concentrations          |
| m26       | Total Lipids in Medium LDL                                       | Total lipid concentrations          |
| m27       | Total Lipids in Small LDL                                        | Total lipid concentrations          |
| m28       | Total Lipids in Very Large HDL                                   | Total lipid concentrations          |
| m29       | Total Lipids in Large HDL                                        | Total lipid concentrations          |
| m30       | Total Lipids in Medium HDL                                       | Total lipid concentrations          |
| m31       | Total Lipids in Small HDL                                        | Total lipid concentrations          |
| m32       | Total Lipids in VLDL                                             | Total lipid concentrations          |
| m33       | Total Lipids in LDL                                              | Total lipid concentrations          |
| m34       | Total Lipids in HDL                                              | Total lipid concentrations          |
| m35       | Phospholipids in Chylomicrons and Extremely Large VLDL           | Phospholipid concentrations         |
| m36       | Phospholipids in Very Large VLDL                                 | Phospholipid concentrations         |
| m37       | Phospholipids in Large VLDL                                      | Phospholipid concentrations         |
| m38       | Phospholipids in Medium VLDL                                     | Phospholipid concentrations         |
| m39       | Phospholipids in Small VLDL                                      | Phospholipid concentrations         |
| m40       | Phospholipids in Very Small VLDL                                 | Phospholipid concentrations         |
| m41       | Phospholipids in IDL                                             | Phospholipid concentrations         |
| m42       | Phospholipids in Large LDL                                       | Phospholipid concentrations         |
| m43       | Phospholipids in Medium LDL                                      | Phospholipid concentrations         |
| m44       | Phospholipids in Small LDL                                       | Phospholipid concentrations         |
| m45       | Phospholipids in Very Large HDL                                  | Phospholipid concentrations         |
| m46       | Phospholipids in Large HDL                                       | Phospholipid concentrations         |
| m47       | Phospholipids in Medium HDL                                      | Phospholipid concentrations         |
| m48       | Phospholipids in Small HDL                                       | Phospholipid concentrations         |
| m49       | Phospholipids in VLDL                                            | Phospholipid concentrations         |
| m50       | Phospholipids in LDL                                             | Phospholipid concentrations         |



|      |                                                             |                                       |
|------|-------------------------------------------------------------|---------------------------------------|
| m51  | Phospholipids in HDL                                        | Phospholipid concentrations           |
| m52  | Cholesterol in Chylomicrons and Extremely Large VLDL        | Cholesterol concentrations            |
| m53  | Cholesterol in Very Large VLDL                              | Cholesterol concentrations            |
| m54  | Cholesterol in Large VLDL                                   | Cholesterol concentrations            |
| m55  | Cholesterol in Medium VLDL                                  | Cholesterol concentrations            |
| m56  | Cholesterol in Small VLDL                                   | Cholesterol concentrations            |
| m57  | Cholesterol in Very Small VLDL                              | Cholesterol concentrations            |
| m58  | Cholesterol in IDL                                          | Cholesterol concentrations            |
| m59  | Cholesterol in Large LDL                                    | Cholesterol concentrations            |
| m60  | Cholesterol in Medium LDL                                   | Cholesterol concentrations            |
| m61  | Cholesterol in Small LDL                                    | Cholesterol concentrations            |
| m62  | Cholesterol in Very Large HDL                               | Cholesterol concentrations            |
| m63  | Cholesterol in Large HDL                                    | Cholesterol concentrations            |
| m64  | Cholesterol in Medium HDL                                   | Cholesterol concentrations            |
| m65  | Cholesterol in Small HDL                                    | Cholesterol concentrations            |
| m66  | VLDL Cholesterol                                            | Cholesterol concentrations            |
| m67  | LDL Cholesterol                                             | Cholesterol concentrations            |
| m68  | HDL Cholesterol                                             | Cholesterol concentrations            |
| m69  | Cholesteryl Esters in Chylomicrons and Extremely Large VLDL | Esterified cholesterol concentrations |
| m70  | Cholesteryl Esters in Very Large VLDL                       | Esterified cholesterol concentrations |
| m71  | Cholesteryl Esters in Large VLDL                            | Esterified cholesterol concentrations |
| m72  | Cholesteryl Esters in Medium VLDL                           | Esterified cholesterol concentrations |
| m73  | Cholesteryl Esters in Small VLDL                            | Esterified cholesterol concentrations |
| m74  | Cholesteryl Esters in Very Small VLDL                       | Esterified cholesterol concentrations |
| m75  | Cholesteryl Esters in IDL                                   | Esterified cholesterol concentrations |
| m76  | Cholesteryl Esters in Large LDL                             | Esterified cholesterol concentrations |
| m77  | Cholesteryl Esters in Medium LDL                            | Esterified cholesterol concentrations |
| m78  | Cholesteryl Esters in Small LDL                             | Esterified cholesterol concentrations |
| m79  | Cholesteryl Esters in Very Large HDL                        | Esterified cholesterol concentrations |
| m80  | Cholesteryl Esters in Large HDL                             | Esterified cholesterol concentrations |
| m81  | Cholesteryl Esters in Medium HDL                            | Esterified cholesterol concentrations |
| m82  | Cholesteryl Esters in Small HDL                             | Esterified cholesterol concentrations |
| m83  | Cholesteryl Esters in VLDL                                  | Esterified cholesterol concentrations |
| m84  | Cholesteryl Esters in LDL                                   | Esterified cholesterol concentrations |
| m85  | Cholesteryl Esters in HDL                                   | Esterified cholesterol concentrations |
| m86  | Free Cholesterol in Chylomicrons and Extremely Large VLDL   | Free cholesterol concentrations       |
| m87  | Free Cholesterol in Very Large VLDL                         | Free cholesterol concentrations       |
| m88  | Free Cholesterol in Large VLDL                              | Free cholesterol concentrations       |
| m89  | Free Cholesterol in Medium VLDL                             | Free cholesterol concentrations       |
| m90  | Free Cholesterol in Small VLDL                              | Free cholesterol concentrations       |
| m91  | Free Cholesterol in Very Small VLDL                         | Free cholesterol concentrations       |
| m92  | Free Cholesterol in IDL                                     | Free cholesterol concentrations       |
| m93  | Free Cholesterol in Large LDL                               | Free cholesterol concentrations       |
| m94  | Free Cholesterol in Medium LDL                              | Free cholesterol concentrations       |
| m95  | Free Cholesterol in Small LDL                               | Free cholesterol concentrations       |
| m96  | Free Cholesterol in Very Large HDL                          | Free cholesterol concentrations       |
| m97  | Free Cholesterol in Large HDL                               | Free cholesterol concentrations       |
| m98  | Free Cholesterol in Medium HDL                              | Free cholesterol concentrations       |
| m99  | Free Cholesterol in Small HDL                               | Free cholesterol concentrations       |
| m100 | Free Cholesterol in VLDL                                    | Free cholesterol concentrations       |
| m101 | Free Cholesterol in LDL                                     | Free cholesterol concentrations       |
| m102 | Free Cholesterol in HDL                                     | Free cholesterol concentrations       |
| m103 | Triglycerides in Chylomicrons and Extremely Large VLDL      | Triglyceride concentrations           |

|      |                                                             |                                |
|------|-------------------------------------------------------------|--------------------------------|
| m104 | Triglycerides in Very Large VLDL                            | Triglyceride concentrations    |
| m105 | Triglycerides in Large VLDL                                 | Triglyceride concentrations    |
| m106 | Triglycerides in Medium VLDL                                | Triglyceride concentrations    |
| m107 | Triglycerides in Small VLDL                                 | Triglyceride concentrations    |
| m108 | Triglycerides in Very Small VLDL                            | Triglyceride concentrations    |
| m109 | Triglycerides in IDL                                        | Triglyceride concentrations    |
| m110 | Triglycerides in Large LDL                                  | Triglyceride concentrations    |
| m111 | Triglycerides in Medium LDL                                 | Triglyceride concentrations    |
| m112 | Triglycerides in Small LDL                                  | Triglyceride concentrations    |
| m113 | Triglycerides in Very Large HDL                             | Triglyceride concentrations    |
| m114 | Triglycerides in Large HDL                                  | Triglyceride concentrations    |
| m115 | Triglycerides in Medium HDL                                 | Triglyceride concentrations    |
| m116 | Triglycerides in Small HDL                                  | Triglyceride concentrations    |
| m117 | Triglycerides in VLDL                                       | Triglyceride concentrations    |
| m118 | Triglycerides in LDL                                        | Triglyceride concentrations    |
| m119 | Triglycerides in HDL                                        | Triglyceride concentrations    |
| m120 | Apolipoprotein A1                                           | Apolipoproteins                |
| m121 | Apolipoprotein B                                            | Apolipoproteins                |
| m122 | Apolipoprotein B to Apolipoprotein A1 ratio                 | Apolipoproteins                |
| m123 | Polyunsaturated Fatty Acids                                 | Fatty acids                    |
| m124 | Monounsaturated Fatty Acids                                 | Fatty acids                    |
| m125 | Saturated Fatty Acids                                       | Fatty acids                    |
| m126 | Docosahexaenoic Acid                                        | Fatty acids                    |
| m127 | Linoleic Acid                                               | Fatty acids                    |
| m128 | Omega-3 Fatty Acids                                         | Fatty acids                    |
| m129 | Omega-6 Fatty Acids                                         | Fatty acids                    |
| m130 | Total Fatty Acids                                           | Fatty acids                    |
| m131 | Polyunsaturated Fatty Acids to Total Fatty Acids percentage | Fatty acids                    |
| m132 | Monounsaturated Fatty Acids to Total Fatty Acids percentage | Fatty acids                    |
| m133 | Saturated Fatty Acids to Total Fatty Acids percentage       | Fatty acids                    |
| m134 | Docosahexaenoic Acid to Total Fatty Acids percentage        | Fatty acids                    |
| m135 | Linoleic Acid to Total Fatty Acids percentage               | Fatty acids                    |
| m136 | Omega-3 Fatty Acids to Total Fatty Acids percentage         | Fatty acids                    |
| m137 | Omega-6 Fatty Acids to Total Fatty Acids percentage         | Fatty acids                    |
| m138 | Total Cholines                                              | Other lipids                   |
| m139 | Phosphatidylcholines                                        | Other lipids                   |
| m140 | Sphingomyelins                                              | Other lipids                   |
| m141 | Phosphoglycerides                                           | Other lipids                   |
| m142 | Lactate                                                     | Glycolysis-related metabolites |
| m143 | Citrate                                                     | Glycolysis-related metabolites |
| m144 | Glucose                                                     | Glycolysis-related metabolites |
| m145 | Alanine                                                     | Amino acids                    |
| m146 | Glutamine                                                   | Amino acids                    |
| m147 | Histidine                                                   | Amino acids                    |
| m148 | Glycine                                                     | Amino acids                    |
| m149 | Isoleucine                                                  | Amino acids                    |
| m150 | Leucine                                                     | Amino acids                    |
| m151 | Valine                                                      | Amino acids                    |
| m152 | Phenylalanine                                               | Amino acids                    |
| m153 | Tyrosine                                                    | Amino acids                    |
| m154 | Acetate                                                     | Ketone bodies                  |
| m155 | Acetoacetate                                                | Ketone bodies                  |
| m156 | 3-Hydroxybutyrate                                           | Ketone bodies                  |

|      |                      |               |
|------|----------------------|---------------|
| m157 | Acetone              | Ketone bodies |
| m158 | Pyruvate             | Ketone bodies |
| m159 | Albumin              | Fluid balance |
| m160 | Creatinine           | Fluid balance |
| m161 | Glycoprotein Acetyls | Inflammation  |

**Supplementary Table S3 Baseline characteristics of 1:1 matched case-control study**

| <b>Baseline Characteristics*</b>           | <b>Control<br/>N=372</b> | <b>Case<br/>N=372</b> | <b>Bias, %</b> | <b>p Value</b> |
|--------------------------------------------|--------------------------|-----------------------|----------------|----------------|
| <b>Age(yrs), mean (SD)</b>                 | 60.2 (7.2)               | 61.0 (6.6)            | 2.1            | 0.749          |
| <b>Sex, %</b>                              |                          |                       | -6.5           | 0.309          |
| Male                                       | 80.1                     | 78.8                  |                |                |
| Female                                     | 19.9                     | 21.2                  |                |                |
| <b>Race</b>                                |                          |                       | 2.1            | 0.782          |
| (White, %)                                 | 91.9                     | 94.1                  |                |                |
| <b>Smoking Status, %</b>                   |                          |                       | 0.2            | 0.977          |
| Never                                      | 46.3                     | 32.7                  |                |                |
| Past                                       | 44.9                     | 55.0                  |                |                |
| Current                                    | 8.3                      | 11.8                  |                |                |
| Missing                                    | 0.5                      | 0.5                   |                |                |
| <b>Alcohol drinking, %</b>                 |                          |                       | -0.1           | 0.598          |
| Never                                      | 5.9                      | 4.5                   |                |                |
| Past                                       | 5.7                      | 7.8                   |                |                |
| Current                                    | 88.4                     | 87.7                  |                |                |
| <b>Physical activity</b>                   |                          |                       | -1.3           | 0.871          |
| (MET Min/ week), mean (SD)                 | 2098.3 (2287.2)          | 2267.6 (2502.6)       |                |                |
| <b>BMI, %</b>                              |                          |                       | 3.3            | 0.648          |
| Normal (<25 kg/m <sup>2</sup> )            | 20.5                     | 19.8                  |                |                |
| Overweight (25 to 29.9 kg/m <sup>2</sup> ) | 43.0                     | 35.7                  |                |                |
| Obesity (≥30 kg/m <sup>2</sup> )           | 36.0                     | 43.4                  |                |                |
| Missing                                    | 0.5                      | 1.1                   |                |                |
| <b>Townsend deprivation index</b>          | -0.62 (3.4)              | -0.58 (3.4)           | 0.2            | 0.979          |
| <b>Diabetes, %</b>                         |                          |                       | -8.6           | 0.325          |
| Yes                                        | 9.4                      | 21.2                  |                |                |
| No                                         | 89.8                     | 78.6                  |                |                |
| Missing                                    | 0.8                      | 0.2                   |                |                |
| <b>Hypertension, %</b>                     |                          |                       | 2.5            | 0.742          |
| Yes                                        | 74.2                     | 73.5                  |                |                |
| No                                         | 25.8                     | 26.5                  |                |                |
| <b>Family history of CVD, %</b>            |                          |                       | 0.0            | 0.999          |
| Yes                                        | 61.9                     | 73.5                  |                |                |
| No                                         | 33.3                     | 22.0                  |                |                |
| Missing                                    | 4.8                      | 4.5                   |                |                |

\* Mean (SD) is presented for continuous variables and percentage for categorical variables.

**Supplementary Table S4 Linear regression of metabolites and healthy lifestyle in matched case-control study<sup>1</sup>**

| Metabolites                                                      | Super Class                           | Coef.. | 95% CI          | <i>p</i> |
|------------------------------------------------------------------|---------------------------------------|--------|-----------------|----------|
| Concentration of Chylomicrons and Extremely Large VLDL Particles | Lipoprotein particle concentrations   | −0.019 | (−0.063, 0.025) | 0.391    |
| Concentration of Very Large VLDL Particles                       | Lipoprotein particle concentrations   | −0.017 | (−0.047, 0.012) | 0.245    |
| Concentration of Large VLDL Particles                            | Lipoprotein particle concentrations   | −0.01  | (−0.033, 0.012) | 0.372    |
| Concentration of Medium VLDL Particles                           | Lipoprotein particle concentrations   | −0.001 | (−0.017, 0.016) | 0.937    |
| Concentration of Small VLDL Particles                            | Lipoprotein particle concentrations   | −0.003 | (−0.017, 0.01)  | 0.625    |
| Concentration of Very Small VLDL Particles                       | Lipoprotein particle concentrations   | −0.003 | (−0.014, 0.007) | 0.532    |
| Concentration of IDL Particles                                   | Lipoprotein particle concentrations   | −0.001 | (−0.012, 0.01)  | 0.805    |
| Concentration of Large LDL Particles                             | Lipoprotein particle concentrations   | 0      | (−0.011, 0.011) | 0.996    |
| Concentration of Medium LDL Particles                            | Esterified cholesterol concentrations | −0.001 | (−0.013, 0.01)  | 0.862    |
| Concentration of Small LDL Particles                             | Lipoprotein particle concentrations   | −0.002 | (−0.011, 0.008) | 0.742    |
| Concentration of Very Large HDL Particles                        | Lipoprotein particle concentrations   | 0.008  | (−0.005, 0.022) | 0.231    |
| Concentration of Large HDL Particles                             | Lipoprotein particle concentrations   | 0.022  | (−0.001, 0.045) | 0.062    |
| Concentration of Medium HDL Particles                            | Lipoprotein particle concentrations   | 0.004  | (−0.006, 0.014) | 0.424    |
| Concentration of Small HDL Particles                             | Lipoprotein particle concentrations   | 0.001  | (−0.005, 0.007) | 0.801    |
| Concentration of VLDL Particles                                  | Lipoprotein particle concentrations   | −0.004 | (−0.017, 0.009) | 0.571    |
| Concentration of LDL Particles                                   | Lipoprotein particle concentrations   | −0.001 | (−0.011, 0.01)  | 0.923    |
| Concentration of HDL Particles                                   | Lipoprotein particle concentrations   | 0.003  | (−0.004, 0.009) | 0.45     |
| Total Lipids in Chylomicrons and Extremely Large VLDL            | Lipoprotein particle concentrations   | −0.019 | (−0.06, 0.022)  | 0.361    |
| Total Lipids in Very Large VLDL                                  | Total lipid concentrations            | −0.017 | (−0.046, 0.012) | 0.262    |
| Total Lipids in Large VLDL                                       | Total lipid concentrations            | −0.009 | (−0.032, 0.014) | 0.432    |
| Total Lipids in Medium VLDL                                      | Total lipid concentrations            | −0.002 | (−0.019, 0.015) | 0.829    |
| Total Lipids in Small VLDL                                       | Total lipid concentrations            | −0.003 | (−0.016, 0.011) | 0.682    |
| Total Lipids in Very Small VLDL                                  | Total lipid concentrations            | −0.003 | (−0.014, 0.007) | 0.548    |
| Total Lipids in IDL                                              | Total lipid concentrations            | 0.001  | (−0.01, 0.011)  | 0.918    |
| Total Lipids in Large LDL                                        | Total lipid concentrations            | −0.001 | (−0.012, 0.011) | 0.903    |
| Total Lipids in Medium LDL                                       | Total lipid concentrations            | −0.002 | (−0.015, 0.01)  | 0.716    |
| Total Lipids in Small LDL                                        | Total lipid concentrations            | −0.002 | (−0.013, 0.008) | 0.676    |
| Total Lipids in Very Large HDL                                   | Total lipid concentrations            | 0.011  | (−0.007, 0.028) | 0.225    |
| Total Lipids in Large HDL                                        | Total lipid concentrations            | 0.016  | (−0.002, 0.034) | 0.076    |
| Total Lipids in Medium HDL                                       | Total lipid concentrations            | 0.003  | (−0.006, 0.012) | 0.528    |
| Total Lipids in Small HDL                                        | Total lipid concentrations            | 0      | (−0.006, 0.006) | 0.893    |
| Total Lipids in VLDL                                             | Total lipid concentrations            | −0.007 | (−0.024, 0.01)  | 0.43     |
| Total Lipids in LDL                                              | Total lipid concentrations            | −0.001 | (−0.013, 0.01)  | 0.824    |
| Total Lipids in HDL                                              | Total lipid concentrations            | 0.004  | (−0.004, 0.011) | 0.373    |
| Phospholipids in Chylomicrons and Extremely Large VLDL           | Total lipid concentrations            | −0.013 | (−0.065, 0.04)  | 0.637    |
| Phospholipids in Very Large VLDL                                 | Phospholipid concentrations           | −0.022 | (−0.061, 0.017) | 0.261    |
| Phospholipids in Large VLDL                                      | Phospholipid concentrations           | −0.027 | (−0.067, 0.014) | 0.192    |
| Phospholipids in Medium VLDL                                     | Phospholipid concentrations           | −0.001 | (−0.019, 0.018) | 0.933    |
| Phospholipids in Small VLDL                                      | Phospholipid concentrations           | −0.001 | (−0.015, 0.013) | 0.915    |
| Phospholipids in Very Small VLDL                                 | Phospholipid concentrations           | −0.004 | (−0.015, 0.006) | 0.43     |
| Phospholipids in IDL                                             | Phospholipid concentrations           | −0.001 | (−0.011, 0.009) | 0.892    |
| Phospholipids in Large LDL                                       | Phospholipid concentrations           | 0      | (−0.011, 0.011) | 0.985    |
| Phospholipids in Medium LDL                                      | Phospholipid concentrations           | −0.002 | (−0.014, 0.01)  | 0.751    |
| Phospholipids in Small LDL                                       | Phospholipid concentrations           | −0.002 | (−0.011, 0.008) | 0.688    |
| Phospholipids in Very Large HDL                                  | Phospholipid concentrations           | 0.009  | (−0.02, 0.038)  | 0.549    |
| Phospholipids in Large HDL                                       | Phospholipid concentrations           | 0.013  | (−0.004, 0.03)  | 0.123    |
| Phospholipids in Medium HDL                                      | Phospholipid concentrations           | 0.002  | (−0.007, 0.01)  | 0.683    |
| Phospholipids in Small HDL                                       | Phospholipid concentrations           | −0.001 | (−0.007, 0.005) | 0.788    |
| Phospholipids in VLDL                                            | Phospholipid concentrations           | −0.006 | (−0.023, 0.011) | 0.484    |
| Phospholipids in LDL                                             | Phospholipid concentrations           | −0.001 | (−0.012, 0.01)  | 0.874    |



|                                                             |                                       |        |                 |         |
|-------------------------------------------------------------|---------------------------------------|--------|-----------------|---------|
| Phospholipids in HDL                                        | Phospholipid concentrations           | 0.002  | (−0.005, 0.01)  | 0.526   |
| Cholesterol in Chylomicrons and Extremely Large VLDL        | Phospholipid concentrations           | −0.013 | (−0.046, 0.02)  | 0.429   |
| Cholesterol in Very Large VLDL                              | Cholesterol concentrations            | −0.011 | (−0.037, 0.015) | 0.403   |
| Cholesterol in Large VLDL                                   | Cholesterol concentrations            | −0.007 | (−0.03, 0.015)  | 0.522   |
| Cholesterol in Medium VLDL                                  | Cholesterol concentrations            | 0.007  | (−0.014, 0.028) | 0.512   |
| Cholesterol in Small VLDL                                   | Cholesterol concentrations            | −0.002 | (−0.016, 0.013) | 0.821   |
| Cholesterol in Very Small VLDL                              | Cholesterol concentrations            | −0.001 | (−0.013, 0.011) | 0.879   |
| Cholesterol in IDL                                          | Cholesterol concentrations            | 0.002  | (−0.01, 0.014)  | 0.72    |
| Cholesterol in Large LDL                                    | Cholesterol concentrations            | 0.001  | (−0.011, 0.013) | 0.811   |
| Cholesterol in Medium LDL                                   | Cholesterol concentrations            | −0.021 | (−0.063, 0.021) | 0.335   |
| Cholesterol in Small LDL                                    | Cholesterol concentrations            | −0.02  | (−0.059, 0.02)  | 0.328   |
| Cholesterol in Very Large HDL                               | Cholesterol concentrations            | 0.011  | (−0.004, 0.026) | 0.16    |
| Cholesterol in Large HDL                                    | Cholesterol concentrations            | 0.025  | (−0.001, 0.05)  | 0.059   |
| Cholesterol in Medium HDL                                   | Cholesterol concentrations            | 0.005  | (−0.005, 0.015) | 0.293   |
| Cholesterol in Small HDL                                    | Cholesterol concentrations            | 0.001  | (−0.005, 0.007) | 0.66    |
| VLDL Cholesterol                                            | Cholesterol concentrations            | −0.003 | (−0.018, 0.013) | 0.708   |
| LDL Cholesterol                                             | Cholesterol concentrations            | −0.02  | (−0.063, 0.023) | 0.356   |
| HDL Cholesterol                                             | Cholesterol concentrations            | 0.006  | (−0.002, 0.015) | 0.159   |
| Cholesteryl Esters in Chylomicrons and Extremely Large VLDL | Cholesterol concentrations            | −0.017 | (−0.051, 0.018) | 0.35    |
| Cholesteryl Esters in Very Large VLDL                       | Esterified cholesterol concentrations | −0.01  | (−0.035, 0.016) | 0.467   |
| Cholesteryl Esters in Large VLDL                            | Esterified cholesterol concentrations | −0.004 | (−0.026, 0.018) | 0.714   |
| Cholesteryl Esters in Medium VLDL                           | Esterified cholesterol concentrations | 0.026  | (−0.01, 0.061)  | 0.156   |
| Cholesteryl Esters in Small VLDL                            | Esterified cholesterol concentrations | −0.003 | (−0.018, 0.012) | 0.684   |
| Cholesteryl Esters in Very Small VLDL                       | Esterified cholesterol concentrations | 0      | (−0.012, 0.012) | 0.986   |
| Cholesteryl Esters in IDL                                   | Esterified cholesterol concentrations | 0.002  | (−0.01, 0.014)  | 0.696   |
| Cholesteryl Esters in Large LDL                             | Esterified cholesterol concentrations | 0.001  | (−0.011, 0.013) | 0.842   |
| Cholesteryl Esters in Medium LDL                            | Esterified cholesterol concentrations | −0.001 | (−0.015, 0.013) | 0.867   |
| Cholesteryl Esters in Small LDL                             | Esterified cholesterol concentrations | −0.021 | (−0.061, 0.02)  | 0.313   |
| Cholesteryl Esters in Very Large HDL                        | Esterified cholesterol concentrations | 0.015  | (−0.003, 0.033) | 0.109   |
| Cholesteryl Esters in Large HDL                             | Esterified cholesterol concentrations | 0.026  | (0.001, 0.052)  | 0.043 * |
| Cholesteryl Esters in Medium HDL                            | Esterified cholesterol concentrations | 0.005  | (−0.004, 0.015) | 0.276   |
| Cholesteryl Esters in Small HDL                             | Esterified cholesterol concentrations | 0.002  | (−0.004, 0.008) | 0.54    |
| Cholesteryl Esters in VLDL                                  | Esterified cholesterol concentrations | −0.002 | (−0.017, 0.013) | 0.794   |
| Cholesteryl Esters in LDL                                   | Esterified cholesterol concentrations | −0.022 | (−0.067, 0.023) | 0.343   |
| Cholesteryl Esters in HDL                                   | Esterified cholesterol concentrations | 0.007  | (−0.002, 0.016) | 0.132   |
| Free Cholesterol in Chylomicrons and Extremely Large VLDL   | Free cholesterol concentrations       | −0.01  | (−0.044, 0.023) | 0.542   |
| Free Cholesterol in Very Large VLDL                         | Free cholesterol concentrations       | −0.015 | (−0.043, 0.013) | 0.285   |
| Free Cholesterol in Large VLDL                              | Free cholesterol concentrations       | −0.01  | (−0.034, 0.013) | 0.391   |
| Free Cholesterol in Medium VLDL                             | Free cholesterol concentrations       | 0.003  | (−0.016, 0.022) | 0.791   |
| Free Cholesterol in Small VLDL                              | Free cholesterol concentrations       | 0.001  | (−0.014, 0.016) | 0.927   |
| Free Cholesterol in Very Small VLDL                         | Free cholesterol concentrations       | −0.003 | (−0.013, 0.008) | 0.651   |
| Free Cholesterol in IDL                                     | Free cholesterol concentrations       | 0.001  | (−0.01, 0.013)  | 0.81    |
| Free Cholesterol in Large LDL                               | Free cholesterol concentrations       | 0.002  | (−0.011, 0.015) | 0.76    |
| Free Cholesterol in Medium LDL                              | Free cholesterol concentrations       | −0.018 | (−0.058, 0.023) | 0.391   |
| Free Cholesterol in Small LDL                               | Free cholesterol concentrations       | −0.017 | (−0.056, 0.021) | 0.378   |
| Free Cholesterol in Very Large HDL                          | Free cholesterol concentrations       | 0.003  | (−0.008, 0.014) | 0.556   |
| Free Cholesterol in Large HDL                               | Free cholesterol concentrations       | 0.02   | (−0.009, 0.05)  | 0.182   |
| Free Cholesterol in Medium HDL                              | Free cholesterol concentrations       | 0.005  | (−0.006, 0.017) | 0.371   |
| Free Cholesterol in Small HDL                               | Free cholesterol concentrations       | 0      | (−0.006, 0.006) | 0.979   |
| Free Cholesterol in VLDL                                    | Free cholesterol concentrations       | −0.004 | (−0.02, 0.012)  | 0.619   |
| Free Cholesterol in LDL                                     | Free cholesterol concentrations       | −0.018 | (−0.059, 0.023) | 0.388   |
| Free Cholesterol in HDL                                     | Free cholesterol concentrations       | 0.005  | (−0.004, 0.013) | 0.317   |
| Triglycerides in Chylomicrons and Extremely Large VLDL      | Triglyceride concentrations           | −0.026 | (−0.091, 0.04)  | 0.447   |

|                                                             |                                |        |                  |         |
|-------------------------------------------------------------|--------------------------------|--------|------------------|---------|
| Triglycerides in Very Large VLDL                            | Triglyceride concentrations    | −0.02  | (−0.052, 0.011)  | 0.208   |
| Triglycerides in Large VLDL                                 | Triglyceride concentrations    | −0.009 | (−0.032, 0.014)  | 0.456   |
| Triglycerides in Medium VLDL                                | Triglyceride concentrations    | −0.005 | (−0.022, 0.013)  | 0.615   |
| Triglycerides in Small VLDL                                 | Triglyceride concentrations    | −0.005 | (−0.02, 0.01)    | 0.543   |
| Triglycerides in Very Small VLDL                            | Triglyceride concentrations    | −0.007 | (−0.019, 0.005)  | 0.253   |
| Triglycerides in IDL                                        | Triglyceride concentrations    | −0.007 | (−0.018, 0.003)  | 0.183   |
| Triglycerides in Large LDL                                  | Triglyceride concentrations    | −0.008 | (−0.019, 0.003)  | 0.147   |
| Triglycerides in Medium LDL                                 | Triglyceride concentrations    | −0.009 | (−0.022, 0.004)  | 0.184   |
| Triglycerides in Small LDL                                  | Triglyceride concentrations    | −0.009 | (−0.023, 0.006)  | 0.244   |
| Triglycerides in Very Large HDL                             | Triglyceride concentrations    | −0.005 | (−0.021, 0.011)  | 0.541   |
| Triglycerides in Large HDL                                  | Triglyceride concentrations    | −0.002 | (−0.018, 0.014)  | 0.799   |
| Triglycerides in Medium HDL                                 | Triglyceride concentrations    | −0.007 | (−0.021, 0.007)  | 0.304   |
| Triglycerides in Small HDL                                  | Triglyceride concentrations    | −0.009 | (−0.021, 0.004)  | 0.162   |
| Triglycerides in VLDL                                       | Triglyceride concentrations    | −0.01  | (−0.031, 0.011)  | 0.349   |
| Triglycerides in LDL                                        | Triglyceride concentrations    | −0.008 | (−0.02, 0.003)   | 0.161   |
| Triglycerides in HDL                                        | Triglyceride concentrations    | −0.007 | (−0.02, 0.006)   | 0.289   |
| Apolipoprotein A1                                           | Apolipoproteins                | 0.002  | (−0.004, 0.009)  | 0.472   |
| Apolipoprotein B                                            | Apolipoproteins                | −0.001 | (−0.011, 0.01)   | 0.856   |
| Apolipoprotein B to Apolipoprotein A1 ratio                 | Apolipoproteins                | −0.003 | (−0.015, 0.008)  | 0.57    |
| Polyunsaturated Fatty Acids                                 | Fatty acids                    | 0.005  | (−0.002, 0.012)  | 0.14    |
| Monounsaturated Fatty Acids                                 | Fatty acids                    | −0.008 | (−0.021, 0.005)  | 0.215   |
| Saturated Fatty Acids                                       | Fatty acids                    | −0.006 | (−0.017, 0.004)  | 0.256   |
| Docosahexaenoic Acid                                        | Fatty acids                    | 0.021  | (0.006, 0.036)   | 0.005 * |
| Linoleic Acid                                               | Fatty acids                    | 0.004  | (−0.005, 0.013)  | 0.35    |
| Omega-3 Fatty Acids                                         | Fatty acids                    | 0.02   | (0.003, 0.037)   | 0.021 * |
| Omega-6 Fatty Acids                                         | Fatty acids                    | 0.003  | (−0.004, 0.01)   | 0.359   |
| Total Fatty Acids                                           | Fatty acids                    | −0.002 | (−0.011, 0.007)  | 0.677   |
| Polyunsaturated Fatty Acids to Total Fatty Acids percentage | Fatty acids                    | 0.007  | (0.003, 0.012)   | 0.001 * |
| Monounsaturated Fatty Acids to Total Fatty Acids percentage | Fatty acids                    | −0.006 | (−0.011, −0.001) | 0.01 *  |
| Saturated Fatty Acids to Total Fatty Acids percentage       | Fatty acids                    | −0.004 | (−0.007, −0.002) | 0.002 * |
| Docosahexaenoic Acid to Total Fatty Acids percentage        | Fatty acids                    | 0.023  | (0.008, 0.038)   | 0.002 * |
| Linoleic Acid to Total Fatty Acids percentage               | Fatty acids                    | 0.006  | (0.001, 0.012)   | 0.024 * |
| Omega-3 Fatty Acids to Total Fatty Acids percentage         | Fatty acids                    | 0.022  | (0.009, 0.035)   | 0.001 * |
| Omega-6 Fatty Acids to Total Fatty Acids percentage         | Fatty acids                    | 0.005  | (0, 0.01)        | 0.035 * |
| Total Cholines                                              | Other lipids                   | 0.001  | (−0.006, 0.008)  | 0.721   |
| Phosphatidylcholines                                        | Other lipids                   | 0.002  | (−0.006, 0.009)  | 0.704   |
| Sphingomyelins                                              | Other lipids                   | −0.001 | (−0.007, 0.006)  | 0.858   |
| Phosphoglycerides                                           | Other lipids                   | 0.001  | (−0.007, 0.009)  | 0.781   |
| Lactate                                                     | Glycolysis-related metabolites | −0.005 | (−0.017, 0.008)  | 0.459   |
| Citrate                                                     | Glycolysis-related metabolites | −0.007 | (−0.015, 0.001)  | 0.081   |
| Glucose                                                     | Glycolysis-related metabolites | −0.011 | (−0.023, 0.002)  | 0.085   |
| Alanine                                                     | Amino acids                    | −0.008 | (−0.018, 0.003)  | 0.142   |
| Glutamine                                                   | Amino acids                    | 0.001  | (−0.006, 0.007)  | 0.839   |
| Histidine                                                   | Amino acids                    | −0.005 | (−0.012, 0.002)  | 0.155   |
| Glycine                                                     | Amino acids                    | 0      | (−0.015, 0.015)  | 0.965   |
| Isoleucine                                                  | Amino acids                    | −0.007 | (−0.02, 0.006)   | 0.277   |
| Leucine                                                     | Amino acids                    | −0.006 | (−0.017, 0.004)  | 0.251   |
| Valine                                                      | Amino acids                    | 0      | (−0.008, 0.008)  | 0.994   |
| Phenylalanine                                               | Amino acids                    | −0.009 | (−0.018, 0)      | 0.042 * |
| Tyrosine                                                    | Amino acids                    | −0.004 | (−0.013, 0.004)  | 0.308   |
| Acetate                                                     | Ketone bodies                  | −0.016 | (−0.046, 0.014)  | 0.285   |

|                      |               |        |                  |         |
|----------------------|---------------|--------|------------------|---------|
| Acetoacetate         | Ketone bodies | −0.032 | (−0.065, 0.002)  | 0.067   |
| 3-Hydroxybutyrate    | Ketone bodies | −0.023 | (−0.053, 0.006)  | 0.124   |
| Acetone              | Ketone bodies | −0.009 | (−0.022, 0.003)  | 0.146   |
| Pyruvate             | Ketone bodies | −0.015 | (−0.031, 0)      | 0.057   |
| Albumin              | Fluid balance | 0.002  | (−0.002, 0.006)  | 0.407   |
| Creatinine           | Fluid balance | −0.012 | (−0.022, −0.003) | 0.014 * |
| Glycoprotein Acetyls | Inflammation  | −0.007 | (−0.014, −0.001) | 0.02 *  |

\* The metabolites that was related to healthy lifestyle. Significance,  $p < 0.05$ . <sup>1</sup> Multivariate linear regression analysis was conducted to adjust for age(continuous), sex(male/female), race (white or other), BMI (<25 kg/m<sup>2</sup>, 25 to 29.9 kg/m<sup>2</sup>, ≥30 kg/m<sup>2</sup>), Townsend Deprivation Index(continuous), diabetes(yes/no), hypertension(yes/no) and family history of cardiovascular disease(yes/no)

Supplementary Table S5 Linear regression of metabolites and healthy lifestyle in cohort study<sup>1</sup>

| Metabolites                                                      | Super Class                           | Coef.  | 95% CI            | <i>p</i> |
|------------------------------------------------------------------|---------------------------------------|--------|-------------------|----------|
| Concentration of Chylomicrons and Extremely Large VLDL Particles | Lipoprotein particle concentrations   | −0.022 | (−0.026, −0.019)  | <0.001 * |
| Concentration of Very Large VLDL Particles                       | Lipoprotein particle concentrations   | −0.012 | (−0.015, −0.01)   | <0.001 * |
| Concentration of Large VLDL Particles                            | Lipoprotein particle concentrations   | −0.008 | (−0.01, −0.006)   | <0.001 * |
| Concentration of Medium VLDL Particles                           | Lipoprotein particle concentrations   | −0.003 | (−0.004, −0.002)  | <0.001 * |
| Concentration of Small VLDL Particles                            | Lipoprotein particle concentrations   | −0.003 | (−0.004, −0.002)  | <0.001 * |
| Concentration of Very Small VLDL Particles                       | Lipoprotein particle concentrations   | −0.003 | (−0.003, −0.002)  | <0.001 * |
| Concentration of IDL Particles                                   | Lipoprotein particle concentrations   | −0.003 | (−0.003, −0.002)  | <0.001 * |
| Concentration of Large LDL Particles                             | Lipoprotein particle concentrations   | −0.001 | (−0.001, 0)       | 0.12     |
| Concentration of Medium LDL Particles                            | Esterified cholesterol concentrations | −0.002 | (−0.003, −0.002)  | <0.001 * |
| Concentration of Small LDL Particles                             | Lipoprotein particle concentrations   | −0.001 | (−0.002, 0)       | 0.001    |
| Concentration of Very Large HDL Particles                        | Lipoprotein particle concentrations   | 0.004  | (0.003, 0.005)    | <0.001 * |
| Concentration of Large HDL Particles                             | Lipoprotein particle concentrations   | 0.001  | (0, 0.003)        | 0.116    |
| Concentration of Medium HDL Particles                            | Lipoprotein particle concentrations   | −0.006 | (−0.007, −0.006)  | <0.001 * |
| Concentration of Small HDL Particles                             | Lipoprotein particle concentrations   | −0.005 | (−0.006, −0.005)  | <0.001 * |
| Concentration of VLDL Particles                                  | Lipoprotein particle concentrations   | −0.004 | (−0.005, −0.0030) | <0.001 * |
| Concentration of LDL Particles                                   | Lipoprotein particle concentrations   | −0.001 | (−0.002, 0)       | 0.003    |
| Concentration of HDL Particles                                   | Lipoprotein particle concentrations   | −0.005 | (−0.005, −0.004)  | <0.001 * |
| Total Lipids in Chylomicrons and Extremely Large VLDL            | Lipoprotein particle concentrations   | −0.021 | (−0.024, −0.018)  | <0.001 * |
| Total Lipids in Very Large VLDL                                  | Total lipid concentrations            | −0.012 | (−0.014, −0.01)   | <0.001 * |
| Total Lipids in Large VLDL                                       | Total lipid concentrations            | −0.007 | (−0.009, −0.006)  | <0.001 * |
| Total Lipids in Medium VLDL                                      | Total lipid concentrations            | −0.004 | (−0.005, −0.003)  | <0.001 * |
| Total Lipids in Small VLDL                                       | Total lipid concentrations            | −0.003 | (−0.004, −0.002)  | <0.001 * |
| Total Lipids in Very Small VLDL                                  | Total lipid concentrations            | −0.003 | (−0.003, −0.002)  | <0.001 * |
| Total Lipids in IDL                                              | Total lipid concentrations            | −0.003 | (−0.004, −0.002)  | <0.001 * |
| Total Lipids in Large LDL                                        | Total lipid concentrations            | −0.003 | (−0.003, −0.002)  | <0.001 * |
| Total Lipids in Medium LDL                                       | Total lipid concentrations            | −0.004 | (−0.005, −0.003)  | <0.001 * |
| Total Lipids in Small LDL                                        | Total lipid concentrations            | −0.002 | (−0.002, −0.001)  | <0.001 * |
| Total Lipids in Very Large HDL                                   | Total lipid concentrations            | 0.007  | (0.005, 0.008)    | <0.001 * |
| Total Lipids in Large HDL                                        | Total lipid concentrations            | 0.001  | (0, 0.002)        | 0.194    |
| Total Lipids in Medium HDL                                       | Total lipid concentrations            | −0.006 | (−0.007, −0.006)  | <0.001 * |
| Total Lipids in Small HDL                                        | Total lipid concentrations            | −0.006 | (−0.006, −0.006)  | <0.001 * |
| Total Lipids in VLDL                                             | Total lipid concentrations            | −0.006 | (−0.007, −0.005)  | <0.001 * |
| Total Lipids in LDL                                              | Total lipid concentrations            | −0.003 | (−0.004, −0.002)  | <0.001 * |
| Total Lipids in HDL                                              | Total lipid concentrations            | −0.004 | (−0.004, −0.003)  | <0.001 * |
| Phospholipids in Chylomicrons and Extremely Large VLDL           | Total lipid concentrations            | −0.025 | (−0.03, −0.02)    | <0.001 * |
| Phospholipids in Very Large VLDL                                 | Phospholipid concentrations           | −0.012 | (−0.015, −0.009)  | <0.001 * |
| Phospholipids in Large VLDL                                      | Phospholipid concentrations           | −0.011 | (−0.014, −0.008)  | <0.001 * |
| Phospholipids in Medium VLDL                                     | Phospholipid concentrations           | −0.003 | (−0.004, −0.002)  | <0.001 * |
| Phospholipids in Small VLDL                                      | Phospholipid concentrations           | −0.002 | (−0.003, −0.002)  | <0.001 * |
| Phospholipids in Very Small VLDL                                 | Phospholipid concentrations           | −0.002 | (−0.003, −0.002)  | <0.001 * |
| Phospholipids in IDL                                             | Phospholipid concentrations           | −0.002 | (−0.003, −0.001)  | <0.001 * |
| Phospholipids in Large LDL                                       | Phospholipid concentrations           | −0.003 | (−0.004, −0.002)  | <0.001 * |
| Phospholipids in Medium LDL                                      | Phospholipid concentrations           | −0.003 | (−0.004, −0.003)  | <0.001 * |
| Phospholipids in Small LDL                                       | Phospholipid concentrations           | 0      | (−0.001, 0.001)   | 0.885    |
| Phospholipids in Very Large HDL                                  | Phospholipid concentrations           | 0.009  | (0.007, 0.011)    | <0.001 * |
| Phospholipids in Large HDL                                       | Phospholipid concentrations           | −0.001 | (−0.002, 0.001)   | 0.413    |
| Phospholipids in Medium HDL                                      | Phospholipid concentrations           | −0.006 | (−0.007, −0.006)  | <0.001 * |
| Phospholipids in Small HDL                                       | Phospholipid concentrations           | −0.006 | (−0.007, −0.006)  | <0.001 * |
| Phospholipids in VLDL                                            | Phospholipid concentrations           | −0.006 | (−0.007, −0.004)  | <0.001 * |
| Phospholipids in LDL                                             | Phospholipid concentrations           | −0.003 | (−0.003, −0.002)  | <0.001 * |



|                                                             |                                       |        |                  |          |
|-------------------------------------------------------------|---------------------------------------|--------|------------------|----------|
| Phospholipids in HDL                                        | Phospholipid concentrations           | −0.004 | (−0.005, −0.004) | <0.001 * |
| Cholesterol in Chylomicrons and Extremely Large VLDL        | Phospholipid concentrations           | −0.02  | (−0.022, −0.017) | <0.001 * |
| Cholesterol in Very Large VLDL                              | Cholesterol concentrations            | −0.008 | (−0.01, −0.006)  | <0.001 * |
| Cholesterol in Large VLDL                                   | Cholesterol concentrations            | −0.006 | (−0.008, −0.004) | <0.001 * |
| Cholesterol in Medium VLDL                                  | Cholesterol concentrations            | −0.001 | (−0.002, 0.001)  | 0.386    |
| Cholesterol in Small VLDL                                   | Cholesterol concentrations            | −0.002 | (−0.003, −0.001) | <0.001 * |
| Cholesterol in Very Small VLDL                              | Cholesterol concentrations            | −0.002 | (−0.003, −0.001) | <0.001 * |
| Cholesterol in IDL                                          | Cholesterol concentrations            | −0.003 | (−0.004, −0.002) | <0.001 * |
| Cholesterol in Large LDL                                    | Cholesterol concentrations            | −0.002 | (−0.003, −0.002) | <0.001 * |
| Cholesterol in Medium LDL                                   | Cholesterol concentrations            | −0.003 | (−0.004, −0.002) | <0.001 * |
| Cholesterol in Small LDL                                    | Cholesterol concentrations            | −0.002 | (−0.003, −0.001) | <0.001 * |
| Cholesterol in Very Large HDL                               | Cholesterol concentrations            | 0.006  | (0.005, 0.007)   | <0.001 * |
| Cholesterol in Large HDL                                    | Cholesterol concentrations            | 0.003  | (0.001, 0.005)   | <0.001 * |
| Cholesterol in Medium HDL                                   | Cholesterol concentrations            | −0.006 | (−0.006, −0.005) | <0.001 * |
| Cholesterol in Small HDL                                    | Cholesterol concentrations            | −0.005 | (−0.005, −0.005) | <0.001 * |
| VLDL Cholesterol                                            | Cholesterol concentrations            | −0.004 | (−0.005, −0.003) | <0.001 * |
| LDL Cholesterol                                             | Cholesterol concentrations            | −0.002 | (−0.003, −0.002) | <0.001 * |
| HDL Cholesterol                                             | Cholesterol concentrations            | −0.003 | (−0.003, −0.002) | <0.001 * |
| Cholesteryl Esters in Chylomicrons and Extremely Large VLDL | Cholesterol concentrations            | −0.021 | (−0.024, −0.018) | <0.001 * |
| Cholesteryl Esters in Very Large VLDL                       | Esterified cholesterol concentrations | −0.007 | (−0.009, −0.005) | <0.001 * |
| Cholesteryl Esters in Large VLDL                            | Esterified cholesterol concentrations | −0.004 | (−0.006, −0.002) | <0.001 * |
| Cholesteryl Esters in Medium VLDL                           | Esterified cholesterol concentrations | 0.002  | (0, 0.003)       | 0.076    |
| Cholesteryl Esters in Small VLDL                            | Esterified cholesterol concentrations | −0.003 | (−0.004, −0.002) | <0.001 * |
| Cholesteryl Esters in Very Small VLDL                       | Esterified cholesterol concentrations | −0.002 | (−0.003, −0.001) | <0.001 * |
| Cholesteryl Esters in IDL                                   | Esterified cholesterol concentrations | −0.003 | (−0.004, −0.002) | <0.001 * |
| Cholesteryl Esters in Large LDL                             | Esterified cholesterol concentrations | −0.002 | (−0.003, −0.002) | <0.001 * |
| Cholesteryl Esters in Medium LDL                            | Esterified cholesterol concentrations | −0.004 | (−0.005, −0.003) | <0.001 * |
| Cholesteryl Esters in Small LDL                             | Esterified cholesterol concentrations | −0.003 | (−0.004, −0.002) | <0.001 * |
| Cholesteryl Esters in Very Large HDL                        | Esterified cholesterol concentrations | 0.006  | (0.005, 0.008)   | <0.001 * |
| Cholesteryl Esters in Large HDL                             | Esterified cholesterol concentrations | 0.003  | (0.002, 0.005)   | <0.001 * |
| Cholesteryl Esters in Medium HDL                            | Esterified cholesterol concentrations | −0.005 | (−0.006, −0.005) | <0.001 * |
| Cholesteryl Esters in Small HDL                             | Esterified cholesterol concentrations | −0.005 | (−0.006, −0.005) | <0.001 * |
| Cholesteryl Esters in VLDL                                  | Esterified cholesterol concentrations | −0.003 | (−0.004, −0.002) | <0.001 * |
| Cholesteryl Esters in LDL                                   | Esterified cholesterol concentrations | −0.003 | (−0.004, −0.002) | <0.001 * |
| Cholesteryl Esters in HDL                                   | Esterified cholesterol concentrations | −0.003 | (−0.003, −0.002) | <0.001 * |
| Free Cholesterol in Chylomicrons and Extremely Large VLDL   | Free cholesterol concentrations       | −0.018 | (−0.02, −0.015)  | <0.001 * |
| Free Cholesterol in Very Large VLDL                         | Free cholesterol concentrations       | −0.009 | (−0.012, −0.007) | <0.001 * |
| Free Cholesterol in Large VLDL                              | Free cholesterol concentrations       | −0.008 | (−0.01, −0.006)  | <0.001 * |
| Free Cholesterol in Medium VLDL                             | Free cholesterol concentrations       | −0.002 | (−0.003, −0.001) | <0.001 * |
| Free Cholesterol in Small VLDL                              | Free cholesterol concentrations       | −0.002 | (−0.003, −0.001) | <0.001 * |
| Free Cholesterol in Very Small VLDL                         | Free cholesterol concentrations       | −0.002 | (−0.003, −0.001) | <0.001 * |
| Free Cholesterol in IDL                                     | Free cholesterol concentrations       | −0.002 | (−0.002, −0.001) | <0.001 * |
| Free Cholesterol in Large LDL                               | Free cholesterol concentrations       | −0.002 | (−0.003, −0.001) | <0.001 * |
| Free Cholesterol in Medium LDL                              | Free cholesterol concentrations       | −0.002 | (−0.003, −0.001) | 0.002    |
| Free Cholesterol in Small LDL                               | Free cholesterol concentrations       | 0.001  | (0, 0.002)       | 0.005    |
| Free Cholesterol in Very Large HDL                          | Free cholesterol concentrations       | 0.005  | (0.005, 0.006)   | <0.001 * |
| Free Cholesterol in Large HDL                               | Free cholesterol concentrations       | 0.002  | (0, 0.003)       | 0.035    |
| Free Cholesterol in Medium HDL                              | Free cholesterol concentrations       | −0.006 | (−0.007, −0.006) | <0.001 * |
| Free Cholesterol in Small HDL                               | Free cholesterol concentrations       | −0.005 | (−0.005, −0.005) | <0.001 * |
| Free Cholesterol in VLDL                                    | Free cholesterol concentrations       | −0.005 | (−0.006, −0.004) | <0.001 * |
| Free Cholesterol in LDL                                     | Free cholesterol concentrations       | −0.001 | (−0.002, 0)      | 0.002    |
| Free Cholesterol in HDL                                     | Free cholesterol concentrations       | −0.003 | (−0.004, −0.002) | <0.001 * |
| Triglycerides in Chylomicrons and Extremely Large VLDL      | Triglyceride concentrations           | −0.02  | (−0.025, −0.014) | <0.001 * |

|                                                             |                                |        |                  |          |
|-------------------------------------------------------------|--------------------------------|--------|------------------|----------|
| Triglycerides in Very Large VLDL                            | Triglyceride concentrations    | −0.013 | (−0.016, −0.01)  | <0.001 * |
| Triglycerides in Large VLDL                                 | Triglyceride concentrations    | −0.007 | (−0.009, −0.005) | <0.001 * |
| Triglycerides in Medium VLDL                                | Triglyceride concentrations    | −0.005 | (−0.006, −0.004) | <0.001 * |
| Triglycerides in Small VLDL                                 | Triglyceride concentrations    | −0.004 | (−0.005, −0.003) | <0.001 * |
| Triglycerides in Very Small VLDL                            | Triglyceride concentrations    | −0.005 | (−0.005, −0.004) | <0.001 * |
| Triglycerides in IDL                                        | Triglyceride concentrations    | −0.005 | (−0.006, −0.004) | <0.001 * |
| Triglycerides in Large LDL                                  | Triglyceride concentrations    | −0.006 | (−0.007, −0.005) | <0.001 * |
| Triglycerides in Medium LDL                                 | Triglyceride concentrations    | −0.006 | (−0.007, −0.005) | <0.001 * |
| Triglycerides in Small LDL                                  | Triglyceride concentrations    | −0.006 | (−0.007, −0.005) | <0.001 * |
| Triglycerides in Very Large HDL                             | Triglyceride concentrations    | −0.004 | (−0.005, −0.003) | <0.001 * |
| Triglycerides in Large HDL                                  | Triglyceride concentrations    | −0.007 | (−0.008, −0.006) | <0.001 * |
| Triglycerides in Medium HDL                                 | Triglyceride concentrations    | −0.011 | (−0.012, −0.01)  | <0.001 * |
| Triglycerides in Small HDL                                  | Triglyceride concentrations    | −0.009 | (−0.01, −0.008)  | <0.001 * |
| Triglycerides in VLDL                                       | Triglyceride concentrations    | −0.008 | (−0.01, −0.007)  | <0.001 * |
| Triglycerides in LDL                                        | Triglyceride concentrations    | −0.006 | (−0.007, −0.005) | <0.001 * |
| Triglycerides in HDL                                        | Triglyceride concentrations    | −0.009 | (−0.01, −0.008)  | <0.001 * |
| Apolipoprotein A1                                           | Apolipoproteins                | −0.004 | (−0.005, −0.004) | <0.001 * |
| Apolipoprotein B                                            | Apolipoproteins                | −0.002 | (−0.002, −0.001) | <0.001 * |
| Apolipoprotein B to Apolipoprotein A1 ratio                 | Apolipoproteins                | 0.003  | (0.002, 0.003)   | <0.001 * |
| Polyunsaturated Fatty Acids                                 | Fatty acids                    | −0.001 | (−0.001, 0)      | 0.002    |
| Monounsaturated Fatty Acids                                 | Fatty acids                    | −0.009 | (−0.01, −0.009)  | <0.001 * |
| Saturated Fatty Acids                                       | Fatty acids                    | −0.008 | (−0.009, −0.008) | <0.001 * |
| Docosahexaenoic Acid                                        | Fatty acids                    | 0.012  | (0.011, 0.013)   | <0.001 * |
| Linoleic Acid                                               | Fatty acids                    | −0.002 | (−0.002, −0.001) | <0.001 * |
| Omega-3 Fatty Acids                                         | Fatty acids                    | 0.012  | (0.011, 0.013)   | <0.001 * |
| Omega-6 Fatty Acids                                         | Fatty acids                    | −0.002 | (−0.003, −0.002) | <0.001 * |
| Total Fatty Acids                                           | Fatty acids                    | −0.005 | (−0.006, −0.005) | <0.001 * |
| Polyunsaturated Fatty Acids to Total Fatty Acids percentage | Fatty acids                    | 0.005  | (0.004, 0.005)   | <0.001 * |
| Monounsaturated Fatty Acids to Total Fatty Acids percentage | Fatty acids                    | −0.004 | (−0.004, −0.004) | <0.001 * |
| Saturated Fatty Acids to Total Fatty Acids percentage       | Fatty acids                    | −0.003 | (−0.003, −0.003) | <0.001 * |
| Docosahexaenoic Acid to Total Fatty Acids percentage        | Fatty acids                    | 0.018  | (0.017, 0.019)   | <0.001 * |
| Linoleic Acid to Total Fatty Acids percentage               | Fatty acids                    | 0.004  | (0.004, 0.004)   | <0.001 * |
| Omega-3 Fatty Acids to Total Fatty Acids percentage         | Fatty acids                    | 0.017  | (0.016, 0.018)   | <0.001 * |
| Omega-6 Fatty Acids to Total Fatty Acids percentage         | Fatty acids                    | 0.003  | (0.003, 0.003)   | <0.001 * |
| Total Cholines                                              | Other lipids                   | −0.004 | (−0.004, −0.004) | <0.001 * |
| Phosphatidylcholines                                        | Other lipids                   | −0.004 | (−0.005, −0.004) | <0.001 * |
| Sphingomyelins                                              | Other lipids                   | −0.003 | (−0.004, −0.003) | <0.001 * |
| Phosphoglycerides                                           | Other lipids                   | −0.005 | (−0.005, −0.004) | <0.001 * |
| Lactate                                                     | Glycolysis-related metabolites | −0.003 | (−0.004, −0.002) | <0.001 * |
| Citrate                                                     | Glycolysis-related metabolites | 0      | (0, 0.001)       | 0.431    |
| Glucose                                                     | Glycolysis-related metabolites | −0.002 | (−0.003, −0.002) | <0.001 * |
| Alanine                                                     | Amino acids                    | 0.002  | (0.002, 0.003)   | <0.001 * |
| Glutamine                                                   | Amino acids                    | 0.002  | (0.002, 0.003)   | <0.001 * |
| Histidine                                                   | Amino acids                    | 0.002  | (0.001, 0.002)   | <0.001 * |
| Glycine                                                     | Amino acids                    | 0.005  | (0.004, 0.006)   | <0.001 * |
| Isoleucine                                                  | Amino acids                    | 0      | (−0.001, 0.001)  | 0.479    |
| Leucine                                                     | Amino acids                    | 0      | (−0.001, 0.001)  | 0.528    |
| Valine                                                      | Amino acids                    | 0.001  | (0.001, 0.002)   | <0.001 * |
| Phenylalanine                                               | Amino acids                    | −0.001 | (−0.001, 0)      | 0.042    |
| Tyrosine                                                    | Amino acids                    | 0      | (−0.001, 0)      | 0.144    |
| Acetate                                                     | Ketone bodies                  | 0.006  | (0.004, 0.008)   | <0.001 * |
| Acetoacetate                                                | Ketone bodies                  | −0.014 | (−0.017, −0.012) | <0.001 * |
| 3-Hydroxybutyrate                                           | Ketone bodies                  | −0.013 | (−0.016, −0.011) | <0.001 * |

|                      |               |        |                  |          |
|----------------------|---------------|--------|------------------|----------|
| Acetone              | Ketone bodies | −0.004 | (−0.005, −0.003) | <0.001 * |
| Pyruvate             | Ketone bodies | −0.004 | (−0.005, −0.003) | <0.001 * |
| Albumin              | Fluid balance | 0.001  | (0.001, 0.001)   | <0.001 * |
| Creatinine           | Fluid balance | −0.002 | (−0.002, −0.001) | <0.001 * |
| Glycoprotein Acetyls | Inflammation  | −0.004 | (−0.005, −0.004) | <0.001 * |

\* The metabolites that was related to healthy lifestyle. We performed a Bonferroni correction to correct the *p* value. Significance, *p* < (0.05/161).

<sup>1</sup> Multivariate linear regression analysis was conducted to adjust for age (continuous), sex (male/female), race (white or other), BMI (<25 kg/m<sup>2</sup>, 25 to 29.9 kg/m<sup>2</sup>, ≥30 kg/m<sup>2</sup>), Townsend Deprivation Index (continuous), diabetes (yes/no), hypertension (yes/no) and family history of cardiovascular disease(yes/no).

**Supplementary Table S6 The association of healthy lifestyle-related metabolites with individual components of healthy lifestyle<sup>1</sup>**

| Metabolite                                                  | Coef. (SD)           |                       |                       |                       |
|-------------------------------------------------------------|----------------------|-----------------------|-----------------------|-----------------------|
|                                                             | Smoking Status       | Alcohol Intake        | Diet                  | Physical Activity     |
| Docosahexaenoic Acid                                        | 0.0144 (0.00194) *   | 0.0236 (0.000973) *   | 0.0295 (0.000673) *   | 0.0260 (0.00303) *    |
| Omega-3 Fatty Acids                                         | 0.00770 (0.00238) *  | 0.0223 (0.00119) *    | 0.0308 (0.000827) *   | 0.00902 (0.00372) *   |
| Polyunsaturated Fatty Acids to Total Fatty Acids percentage | 0.0164 (0.00494) *   | −0.00111 (0.000250) * | 0.00738 (0.000172) *  | 0.0127 (0.000774) *   |
| Monounsaturated Fatty Acids to Total Fatty Acids percentage | −0.0153 (0.000589) * | −0.00286 (0.000297) * | −0.00720 (0.000205) * | −0.0156 (0.000920) *  |
| Linoleic Acid to Total Fatty Acids percentage               | 0.0214 (0.000656) *  | −0.00455 (0.000333) * | 0.00194 (0.000230) *  | 0.0150 ( 0.001027) *  |
| Omega-6 Fatty Acids to Total Fatty Acids percentage         | 0.0157 (0.000540) *  | −0.00280 (0.000272) * | 0.00337 (0.000189) *  | 0.0124 (0.000845) *   |
| Creatinine                                                  | 0.00579 (0.00972) *  | −0.00251 (0.000489) * | −0.00613 (0.000339) * | −0.00622 ( 0.00151) * |
| Glycoprotein Acetyls                                        | −0.0162 (0.000800) * | −0.00414 (0.000403) * | −0.00542 (0.000279) * | −0.0213 ( 0.00125) *  |

\* Significance, *p* < 0.001.

All lifestyle factors were dichotomous and the unhealthy level was considered as the reference group. Metabolite concentrations were natural log10 transformed.

Supplementary Table S7 Performance of risk prediction models for incident heart failure <sup>1</sup>

| Performance Metric              | Models                              |                                          | <i>p</i> Value |
|---------------------------------|-------------------------------------|------------------------------------------|----------------|
|                                 | Model I: Established Risk Factors * | Model II: Risk Factor Plus Metabolites # |                |
| C-statistic (CI)                | 0.788 (0.831, 0.851)                | 0.844 (0.834, 0.854)                     | <0.001         |
| Metrics of relative performance |                                     |                                          |                |
| IDI (CI)                        | Ref                                 | 0.002 (0.002, 0.004)                     | <0.001         |
| Continuous NRI (CI)             | Ref                                 | 0.048 (0.011, 0.077)                     | 0.016          |

\* The established risk factors included age, race, BMI, smoking status, alcohol status, physical activity, Townsend deprivation index, Diabetes and hypertension. # The combination model was the established risk factor plus the healthy lifestyle related-metabolites associated with heart failure, including m126 (docosahexaenoic acid), m128 (omega-3 fatty acids), m160 (creatinine). <sup>1</sup> The C-statistics was calculated to adjust for age (continuous), sex (male/female), race (white or other), BMI (<25 kg/m<sup>2</sup>, 25 to 29.9 kg/m<sup>2</sup>, ≥30 kg/m<sup>2</sup>), Townsend Deprivation Index(continuous), smoking status (current/past/never), alcohol consumption (current/past/never), physical exercise (continuous), diabetes (yes/no) and hypertension (yes/no).

Supplementary Table S8 Sensitivity Analysis<sup>1</sup>

| Exclusion Criteria                                                                   | C-Statistic (CI)                    |                                          |
|--------------------------------------------------------------------------------------|-------------------------------------|------------------------------------------|
|                                                                                      | Model I: Established Risk Factors * | Model II: Risk Factor Plus Metabolites # |
| (1) Excluding the follow-up time <2 years                                            | 0.805 (0.795, 0.815)                | 0.843 (0.833, 0.853)                     |
| (2) Excluding the individuals with any cardiovascular disease at baseline (n=117016) | 0.802 (0.792, 0.812)                | 0.842 (0.832, 0.852)                     |

\* The established risk factors included age, race, BMI, smoking status, alcohol status, physical activity, Townsend deprivation index, Diabetes and hypertension. # The combination model was the established risk factor plus the healthy lifestyle related-metabolites associated with heart failure, including m126 (docosahexaenoic acid), m128 (omega-3 fatty acids), m160 (creatinine). <sup>1</sup> The C-statistics was calculated to adjust for age (continuous), sex (male/female), race (white or other), BMI (<25 kg/m<sup>2</sup>, 25 to 29.9 kg/m<sup>2</sup>, ≥30 kg/m<sup>2</sup>), Townsend Deprivation Index (continuous), smoking status (current/past/never), alcohol consumption (current/past/never), physical exercise (continuous), diabetes (yes/no) and hypertension (yes/no).
